# Supplementary material for: Partner-Aware Prediction of Interacting Residues in Protein-Protein Complexes from Sequence Data
Source: PLOS journal article supplement (doi:10.1371/journal.pone.0029104), 2011-12-14

Figure S2. ROC curves for predicting interacting single residues from models trained on single sequences (SS) and protein pairs (PP).

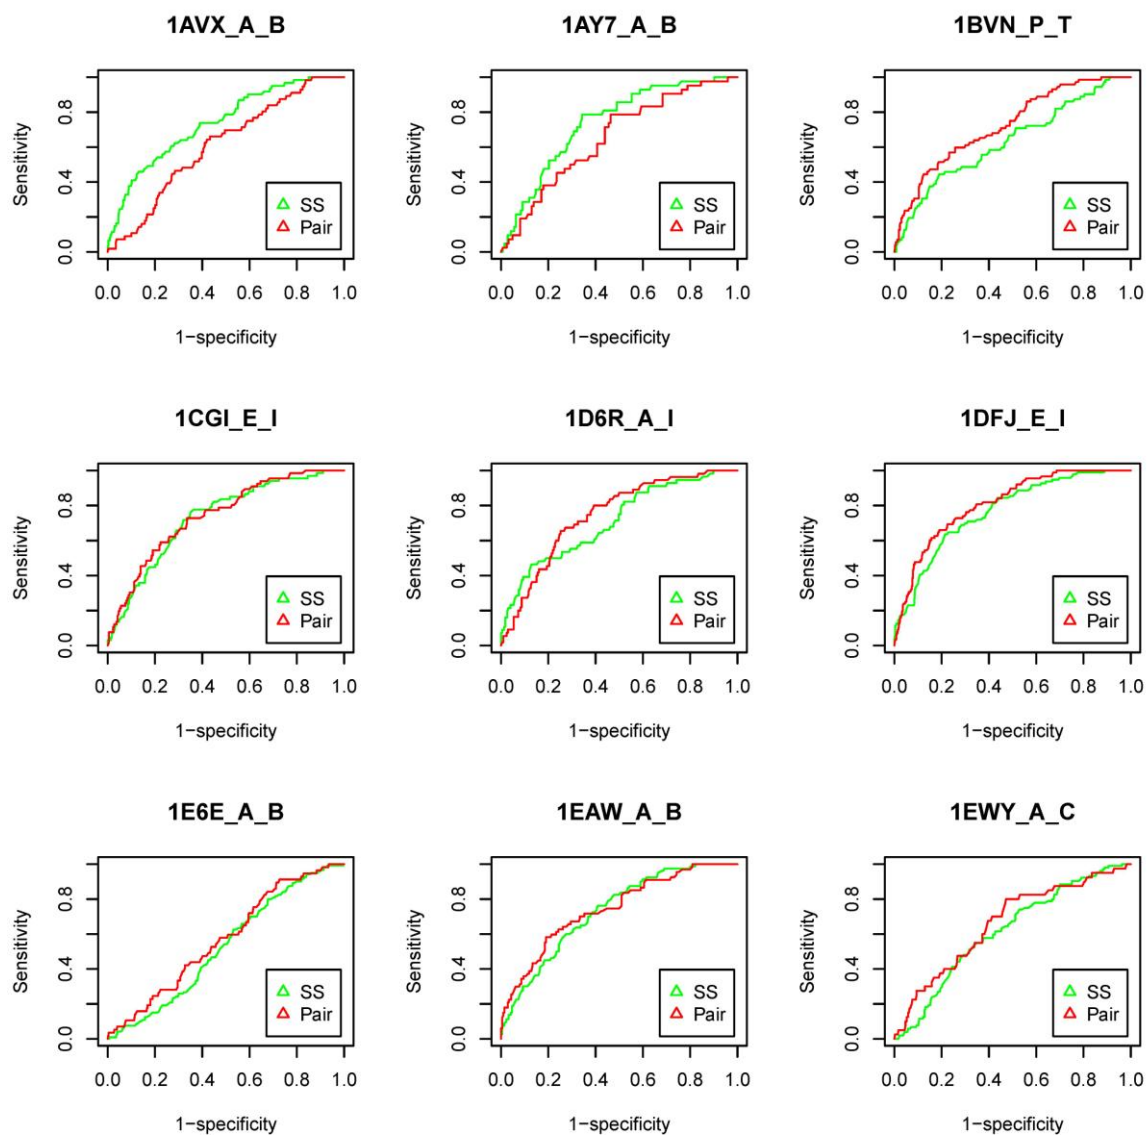

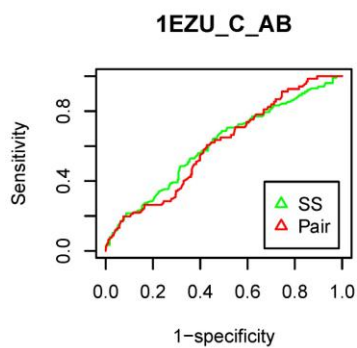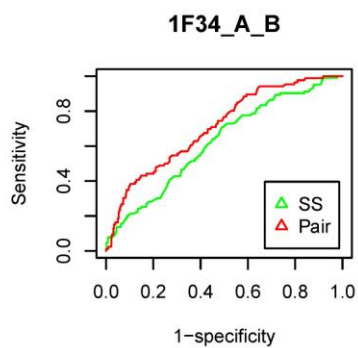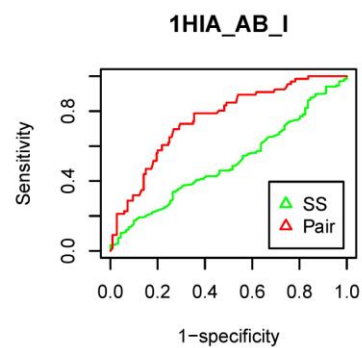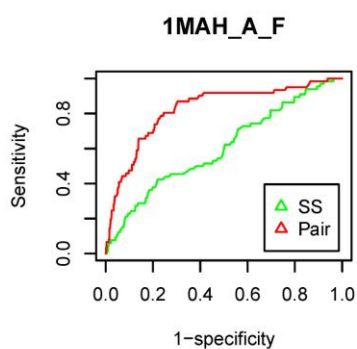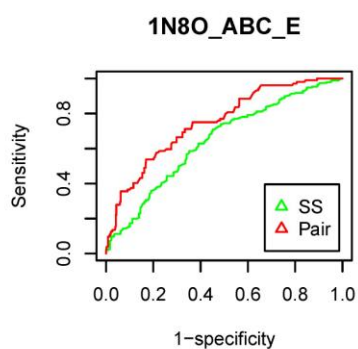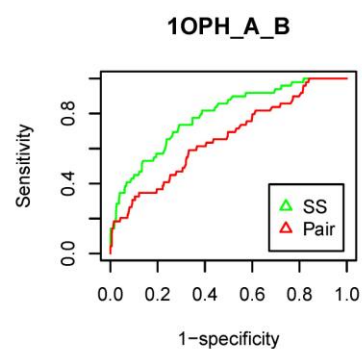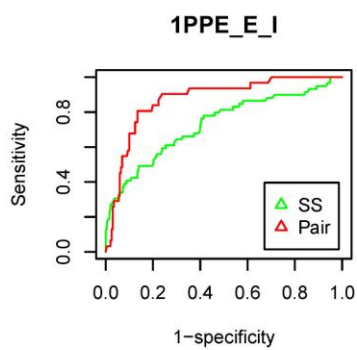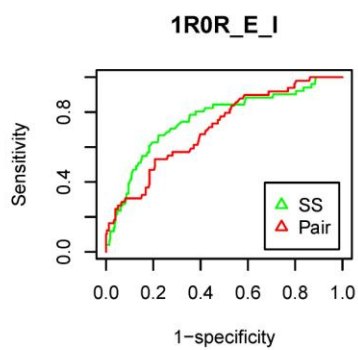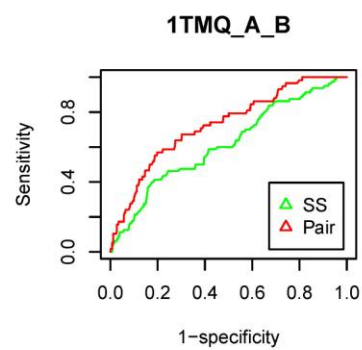

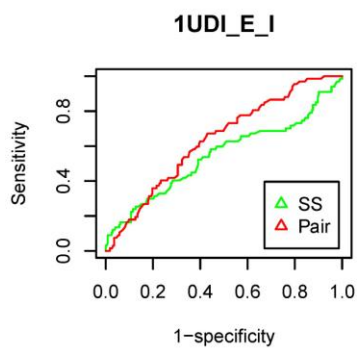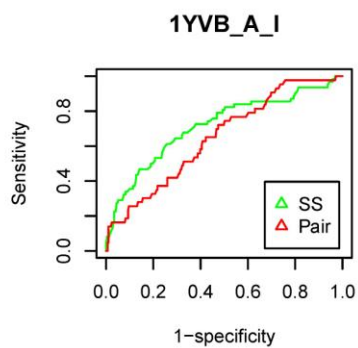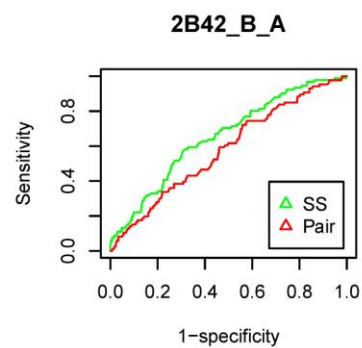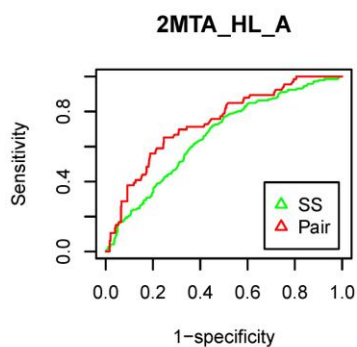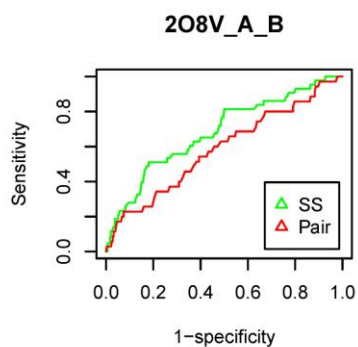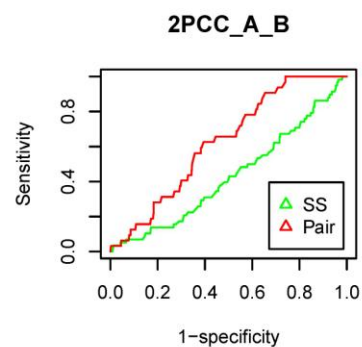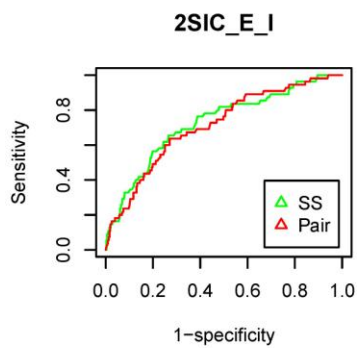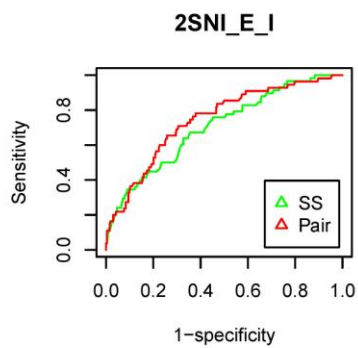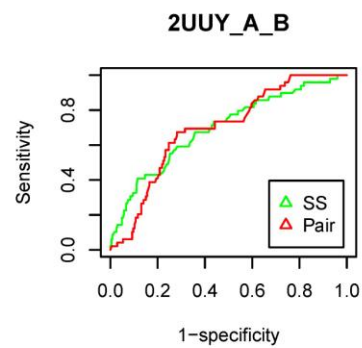

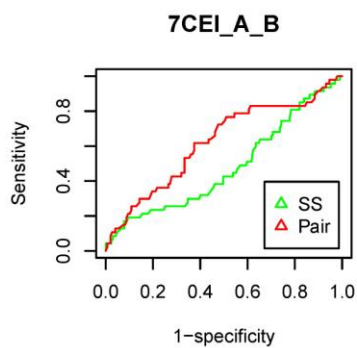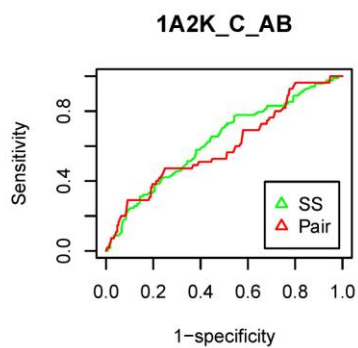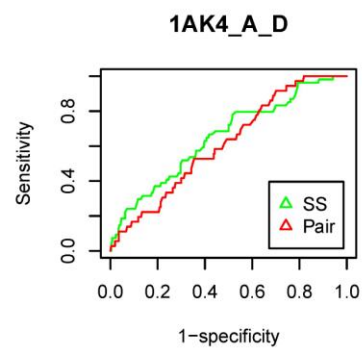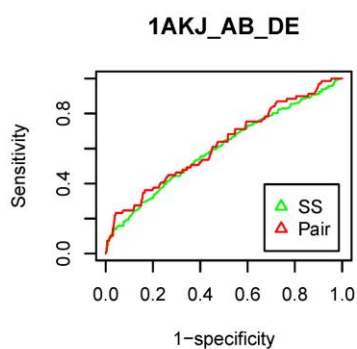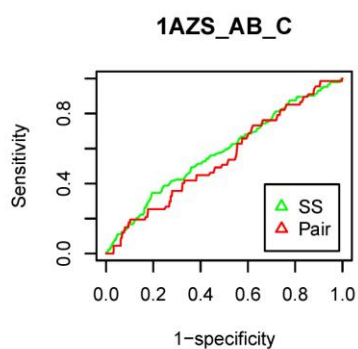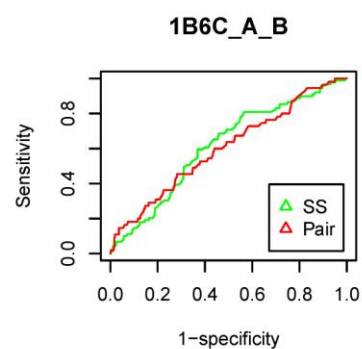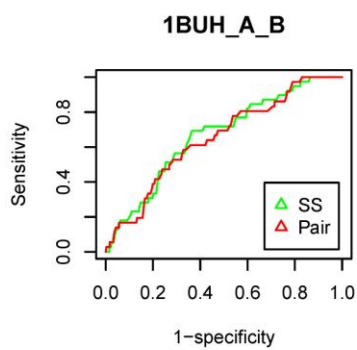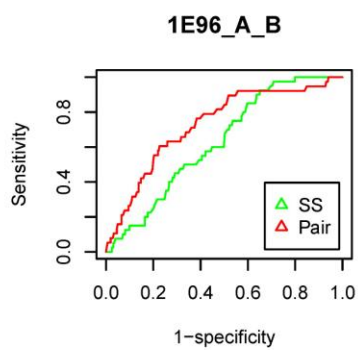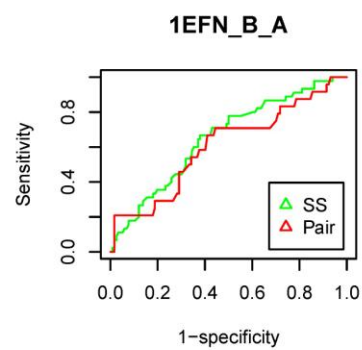

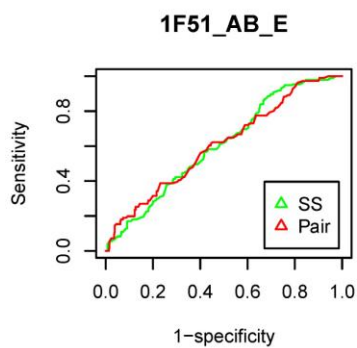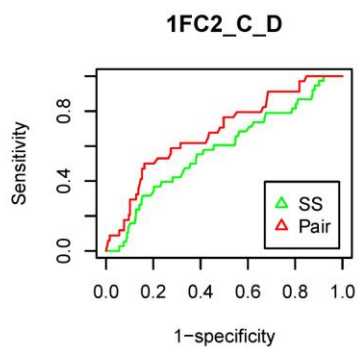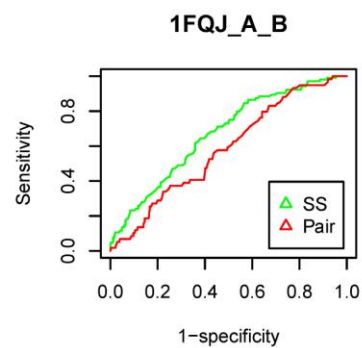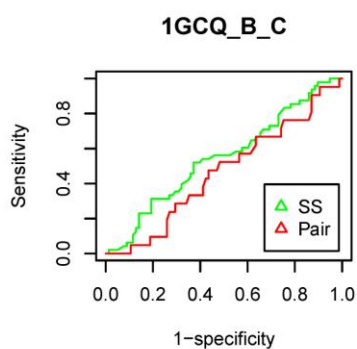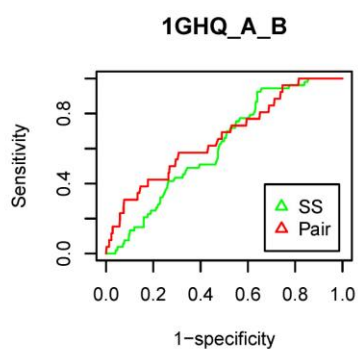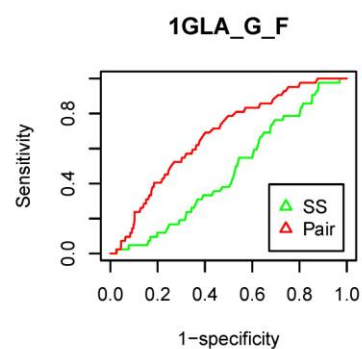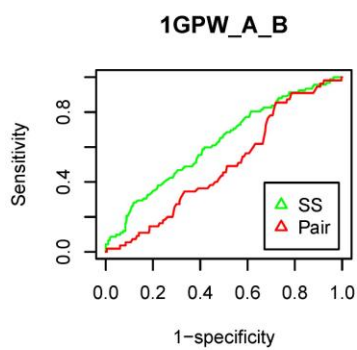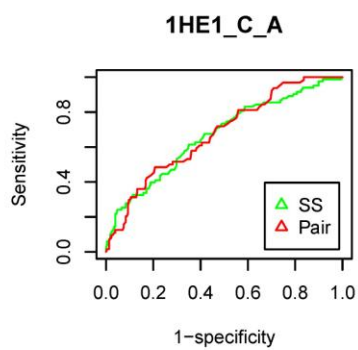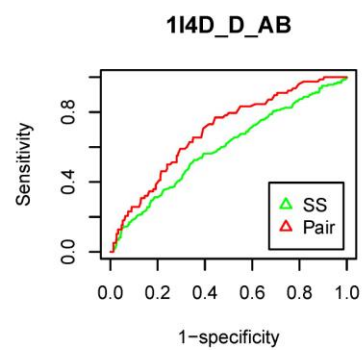

**1J2J\_A\_B**

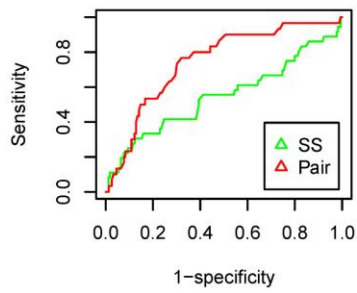

**1K74\_AB\_DE**

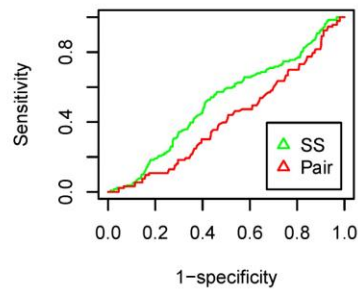

**1KAC\_A\_B**

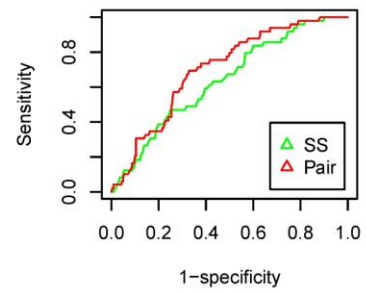

**1KLU\_AB\_D**

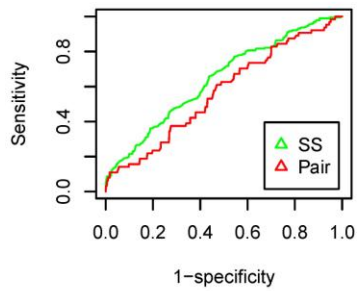

**1KTZ\_A\_B**

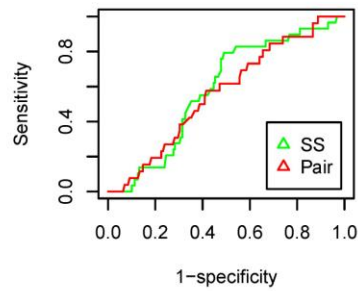

**1KXP\_A\_D**

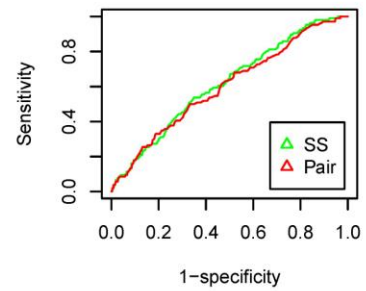

**1QA9\_A\_B**

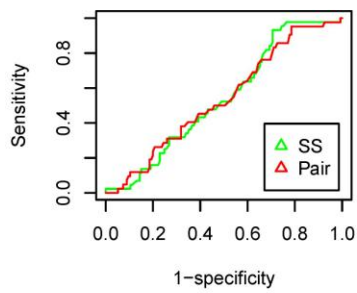

**1RLB\_ABCD\_E**

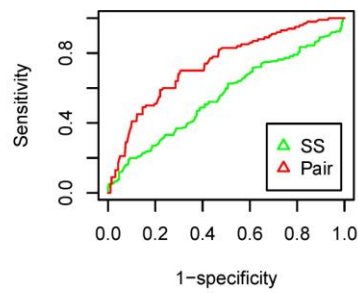

**1S1Q\_A\_B**

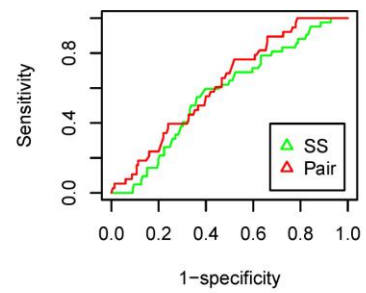

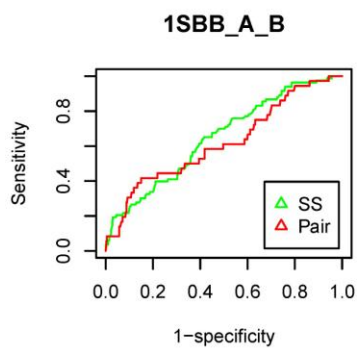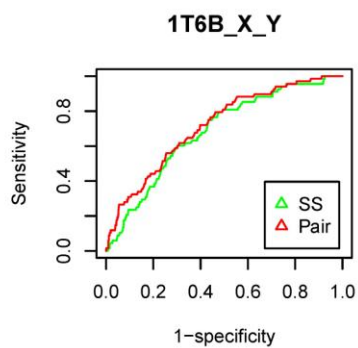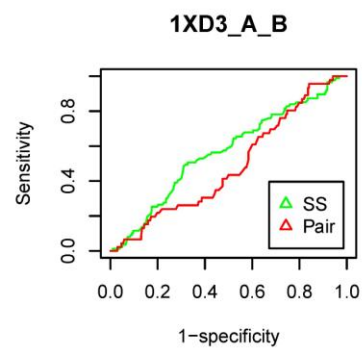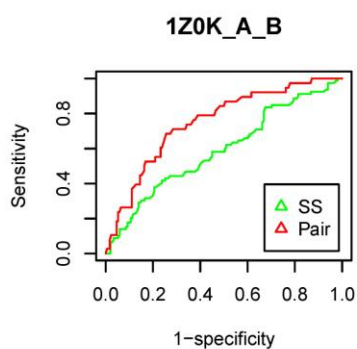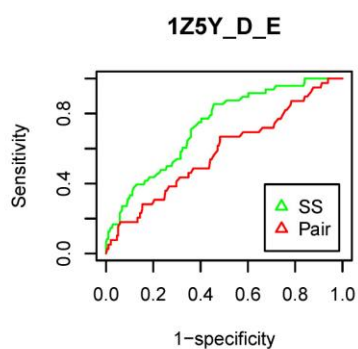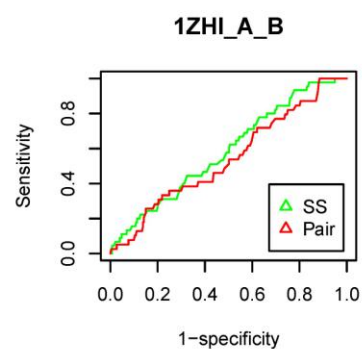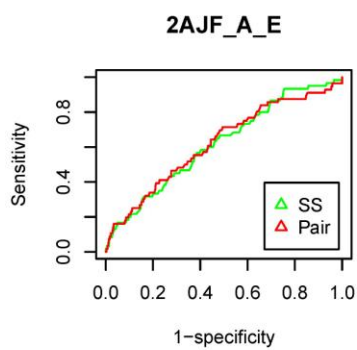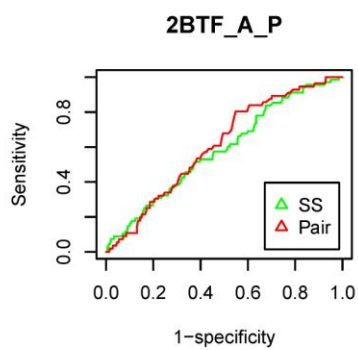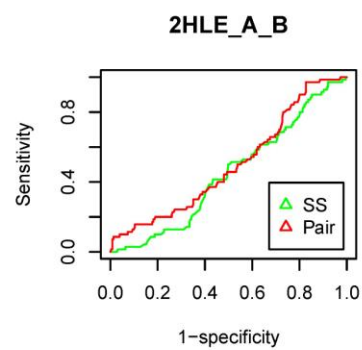



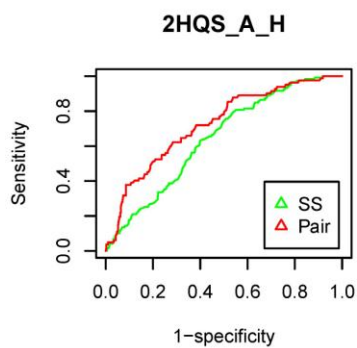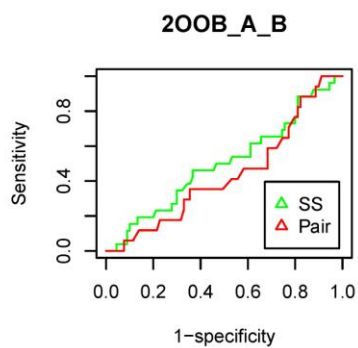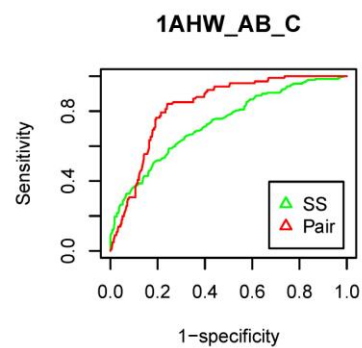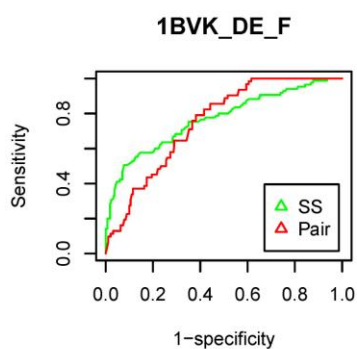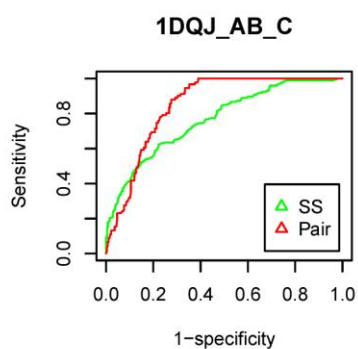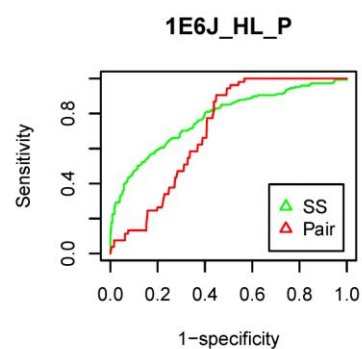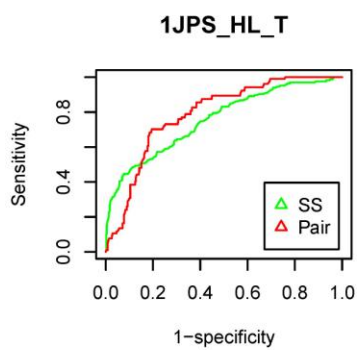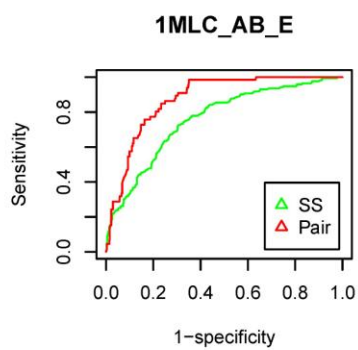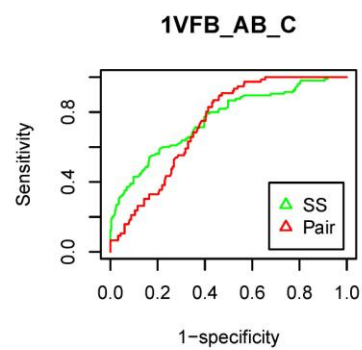



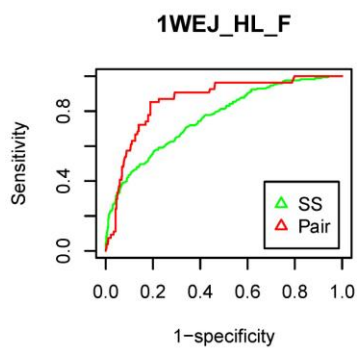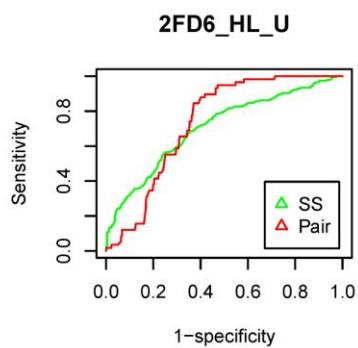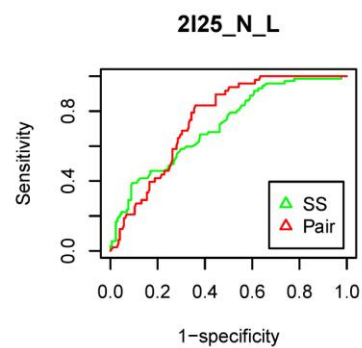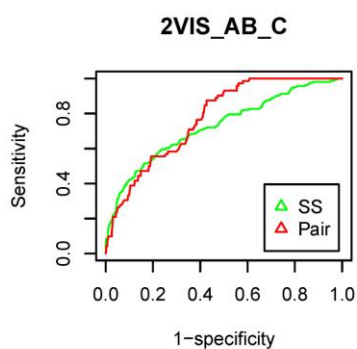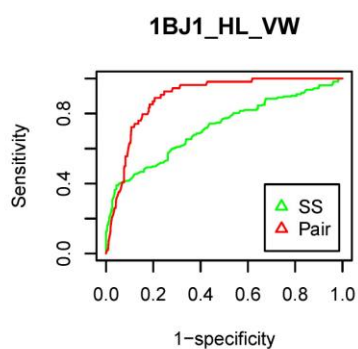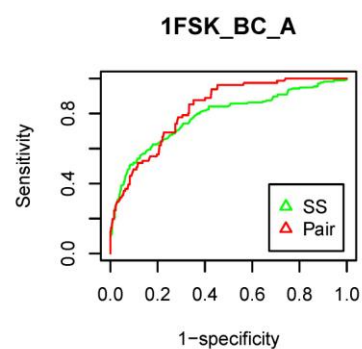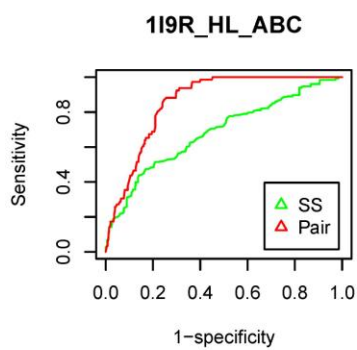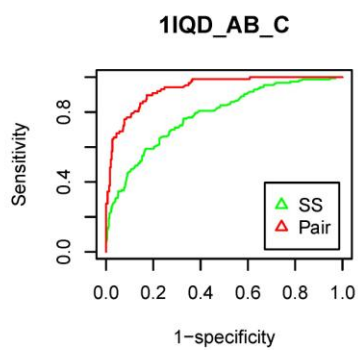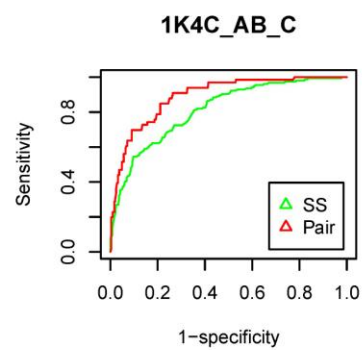

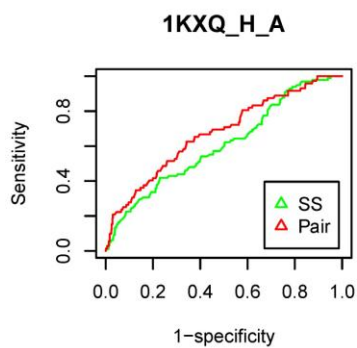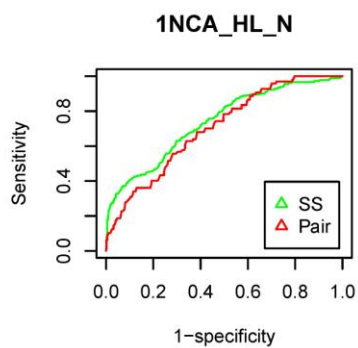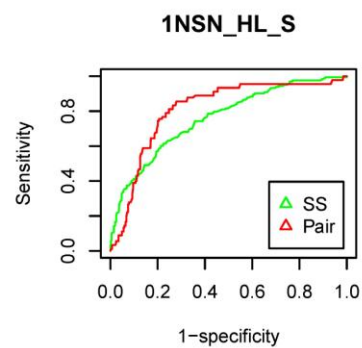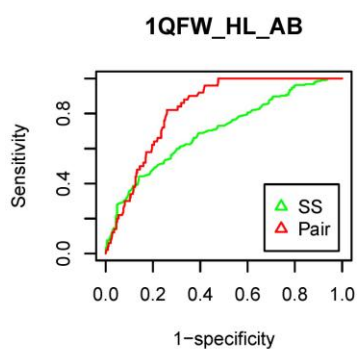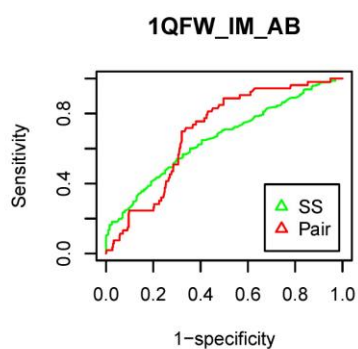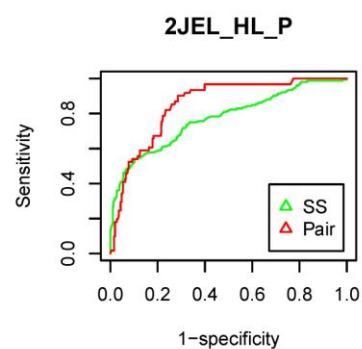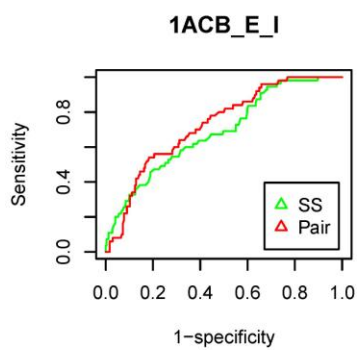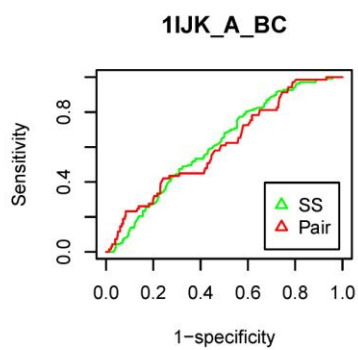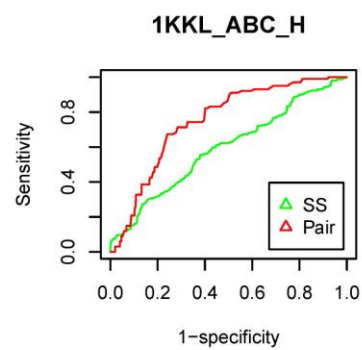

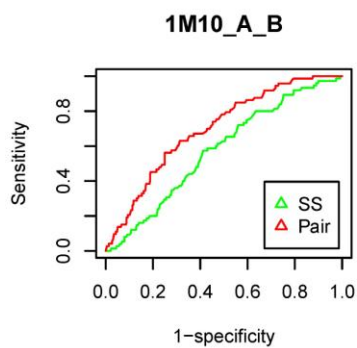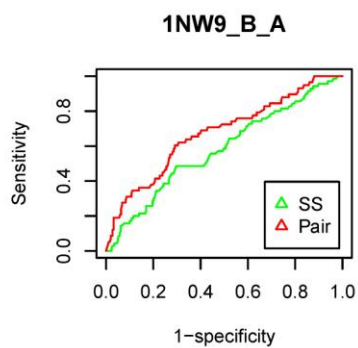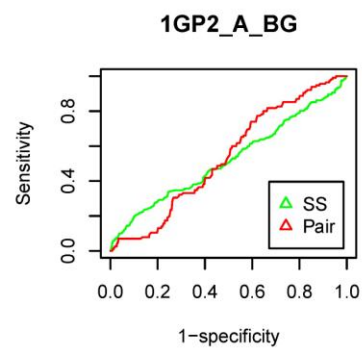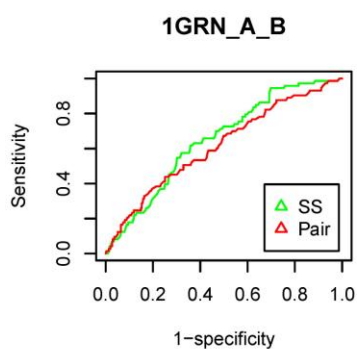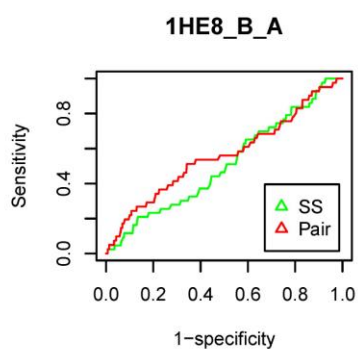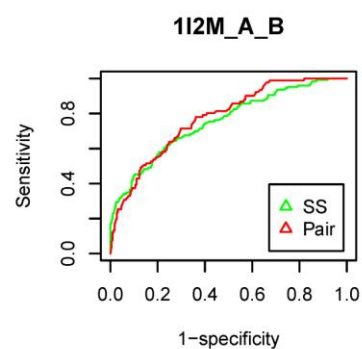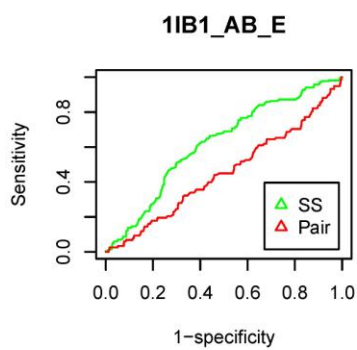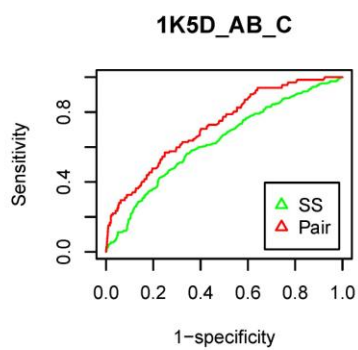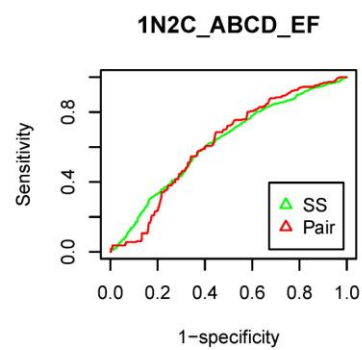

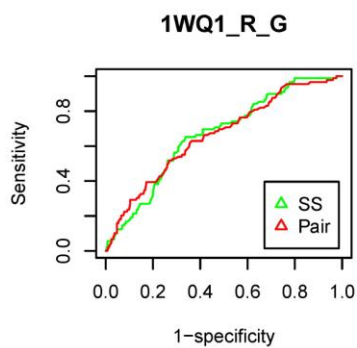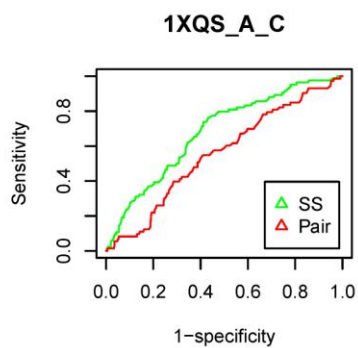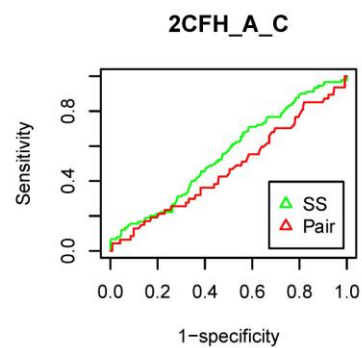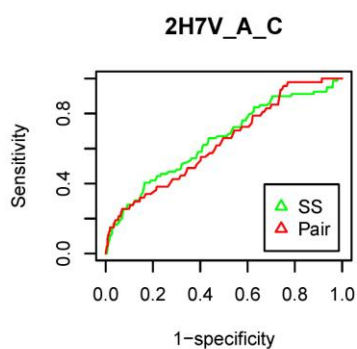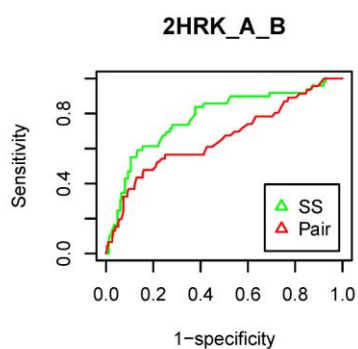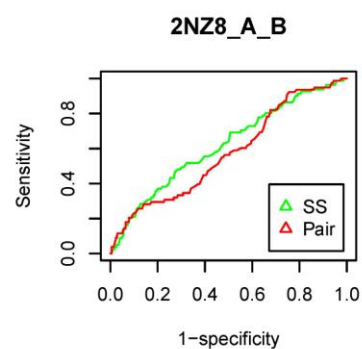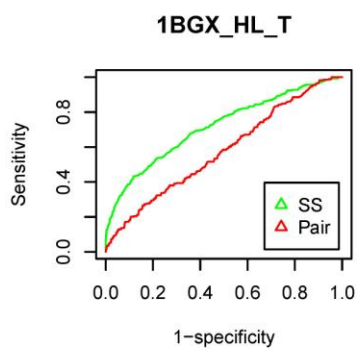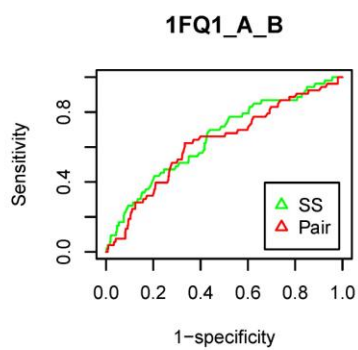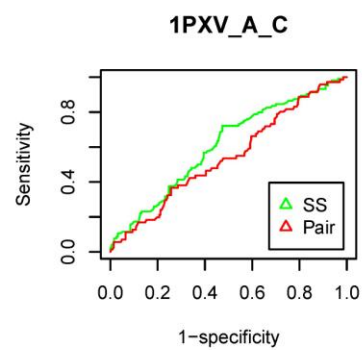

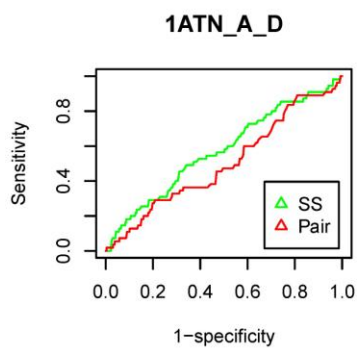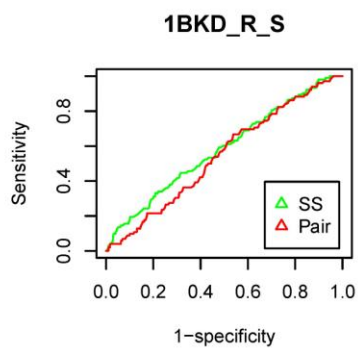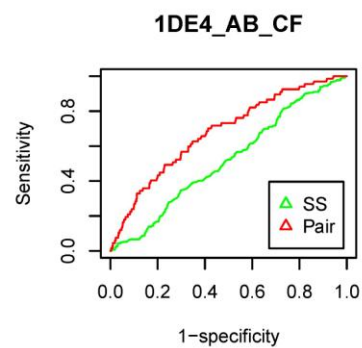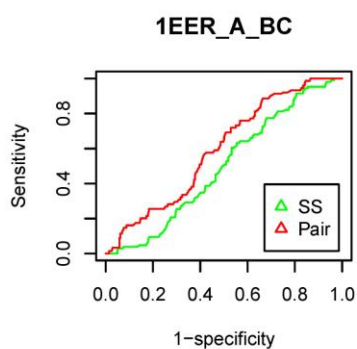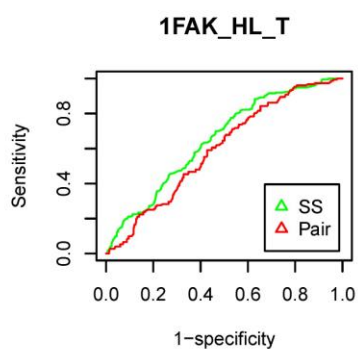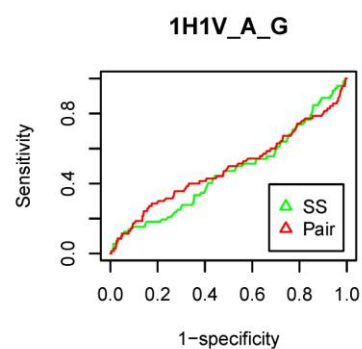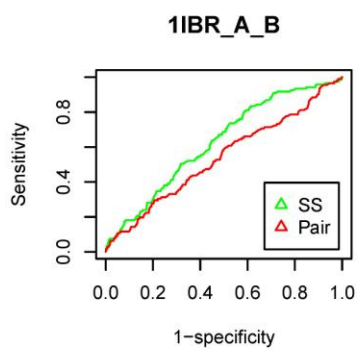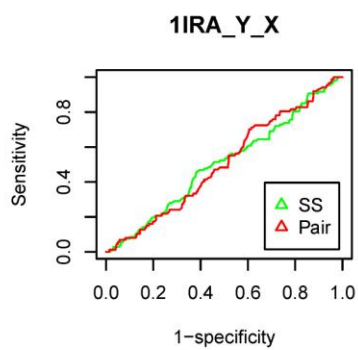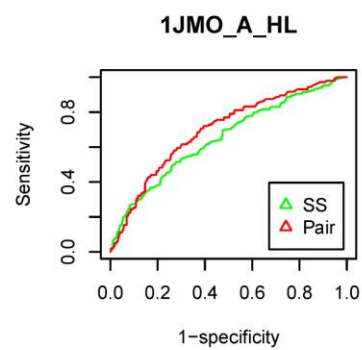

**1R8S\_A\_E**

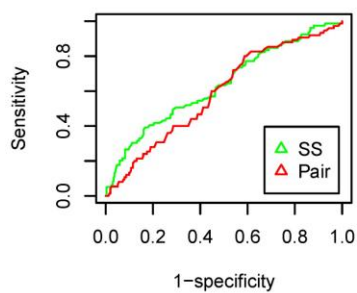

**1Y64\_A\_B**

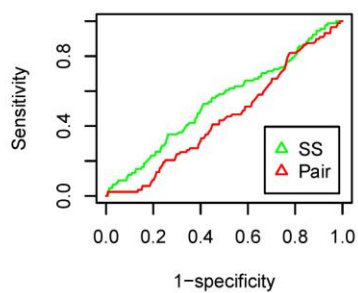

**2C0L\_A\_B**

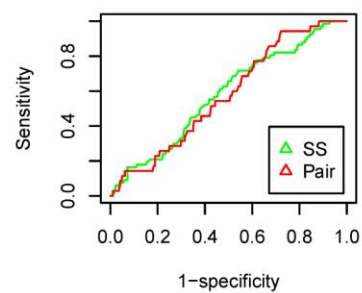

**2OT3\_B\_A**

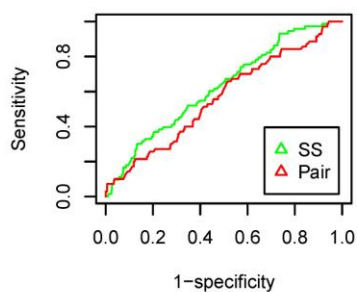

**1E4K\_AB\_C**

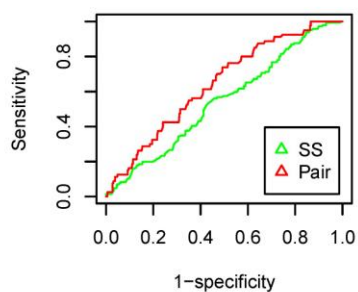

**2HMI\_CD\_AB**

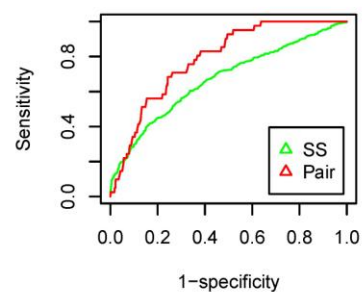

Supplement: S2 (10.1371/journal.pone.0029104.s002) [file journal.pone.0029104.s002]
