# Supplementary material for: Partner-Aware Prediction of Interacting Residues in Protein-Protein Complexes from Sequence Data
Source: PubMed Central journal article supplement (PMC3237601; doi:10.1371/journal.pone.0029104), 2011-12-14

Figure S1. ROC curves for predicting interacting residue pairs from models trained on single sequences (SS) and protein pairs (PP).

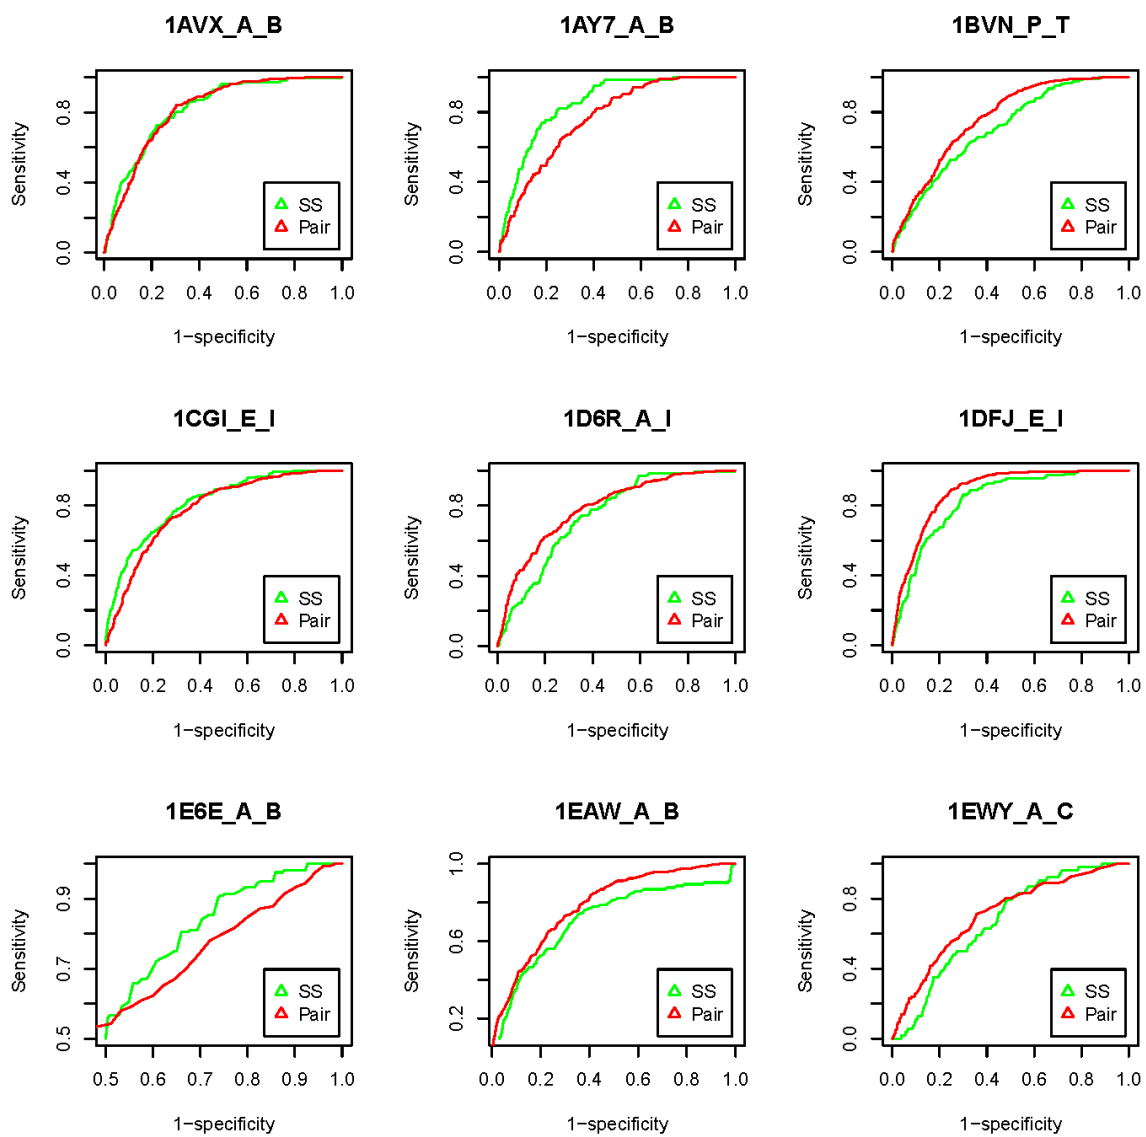

**1EZU\_C\_AB**

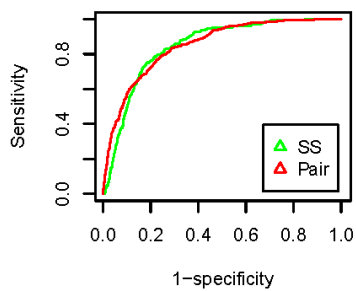

**1F34\_A\_B**

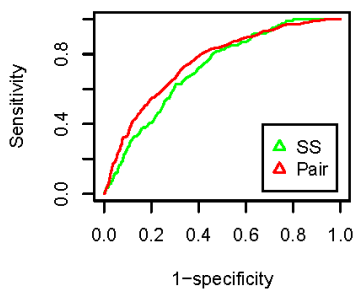

**1HIA\_AB\_I**

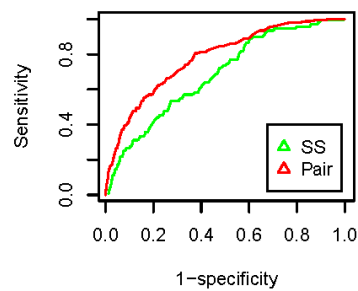

**1MAH\_A\_F**

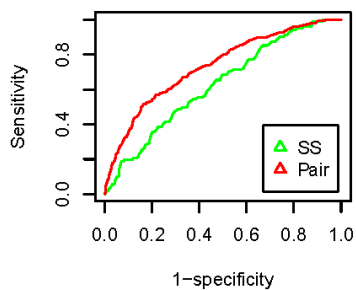

**1N8O\_ABC\_E**

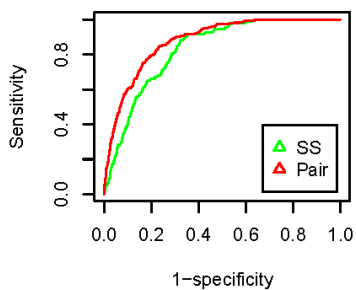

**1OPH\_A\_B**

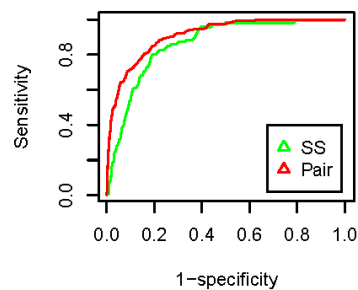

**1PPE\_E\_I**

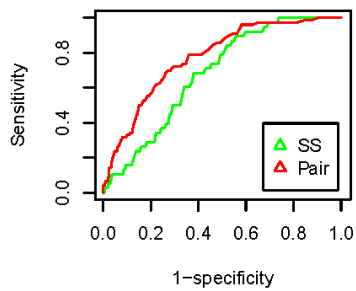

**1R0R\_E\_I**

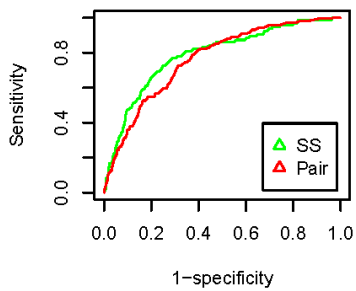

**1TMQ\_A\_B**

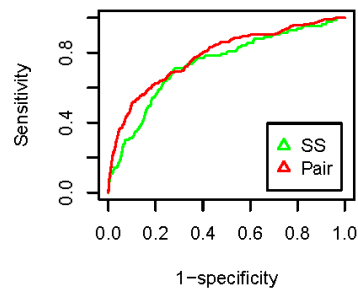

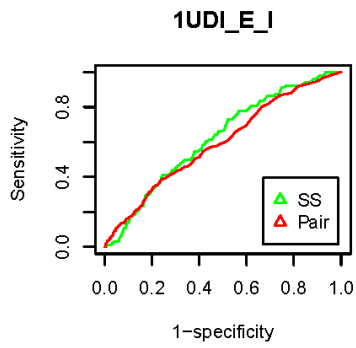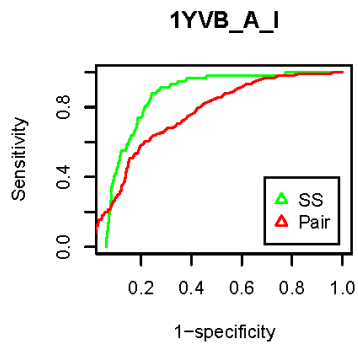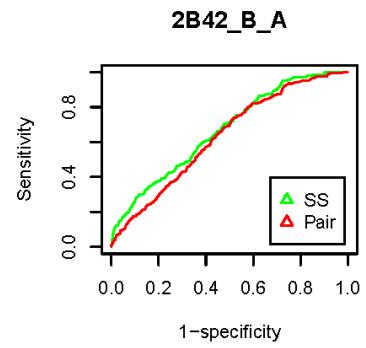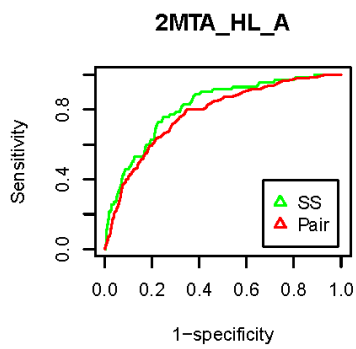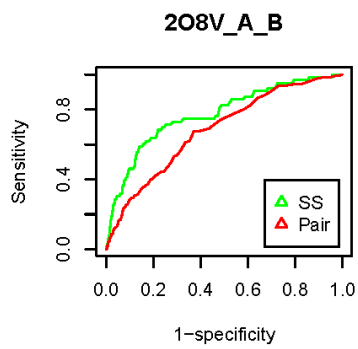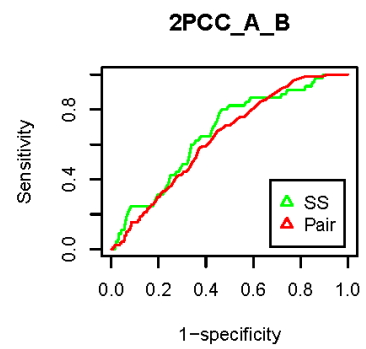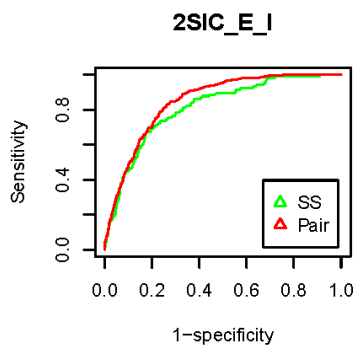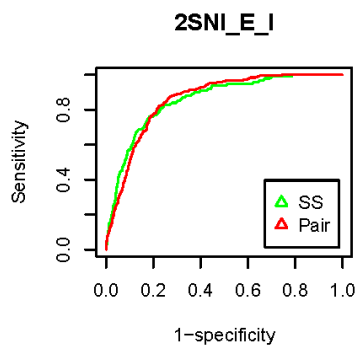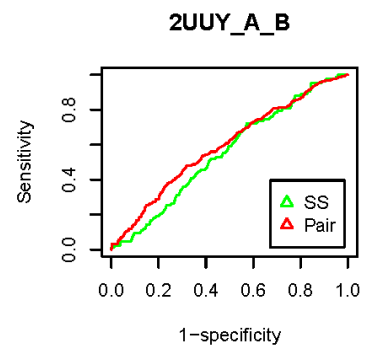

**7CEI\_A\_B**

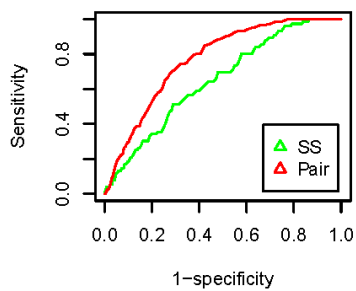

**1A2K\_C\_AB**

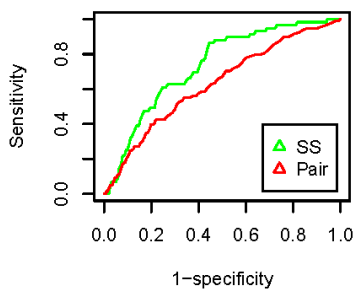

**1AK4\_A\_D**

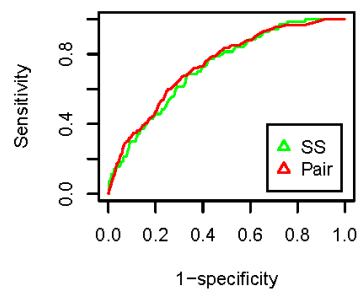

**1AKJ\_AB\_DE**

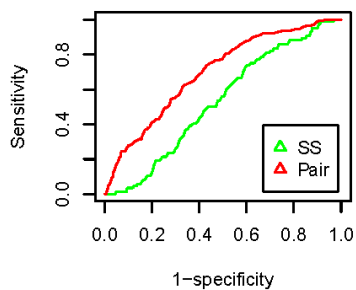

**1AZS\_AB\_C**

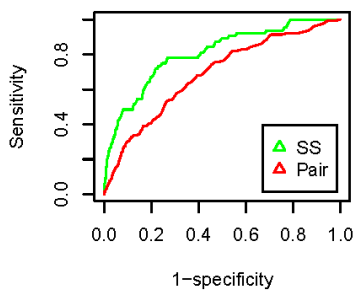

**1B6C\_A\_B**

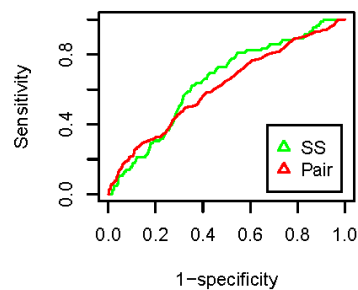

**1BUH\_A\_B**

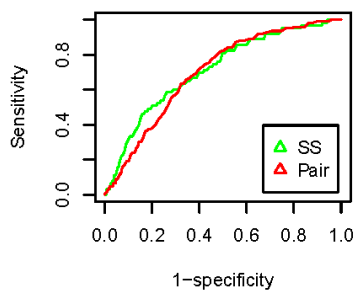

**1E96\_A\_B**

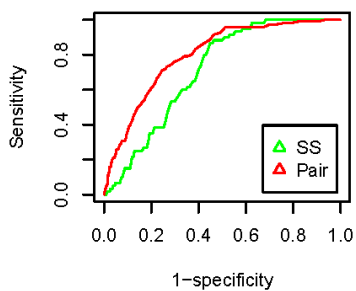

**1EFN\_B\_A**

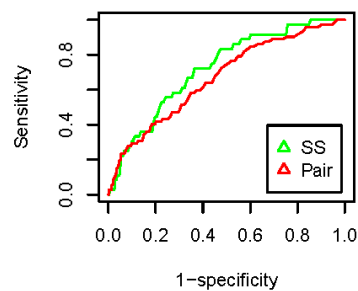

**1F51\_AB\_E**

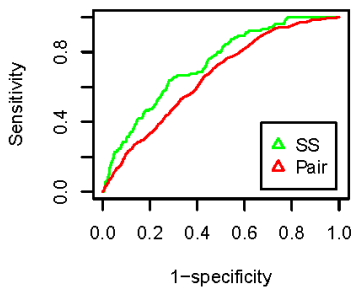

**1FC2\_C\_D**

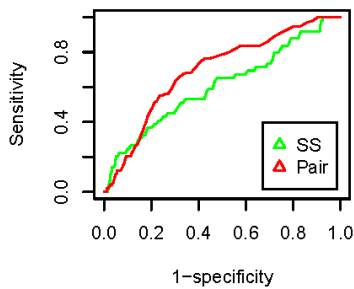

**1FQJ\_A\_B**

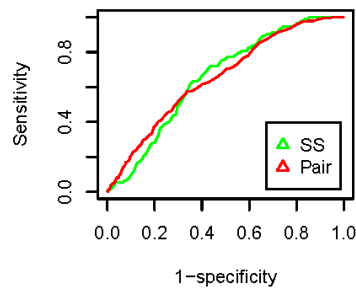

**1GCQ\_B\_C**

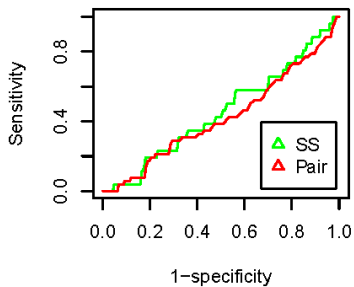

**1GHQ\_A\_B**

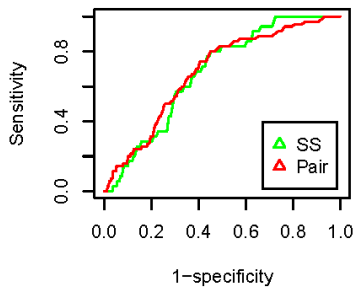

**1GLA\_G\_F**

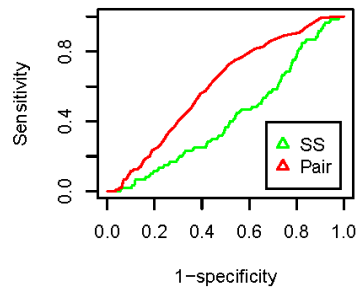

**1GPW\_A\_B**

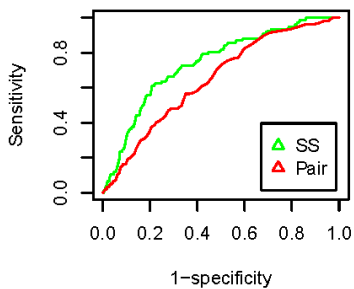

**1HE1\_C\_A**

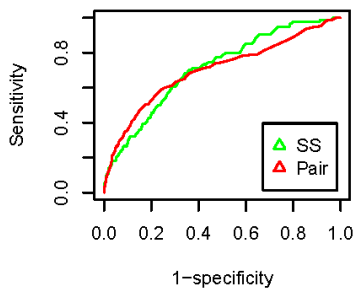

**1I4D\_D\_AB**

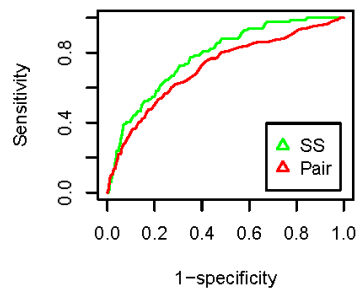

**1J2J\_A\_B**

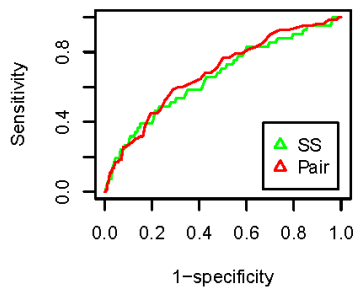

**1K74\_AB\_DE**

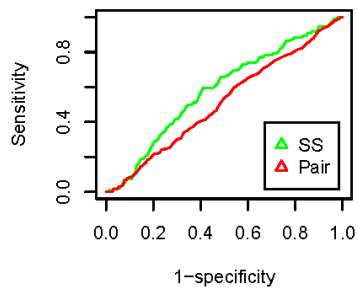

**1KAC\_A\_B**

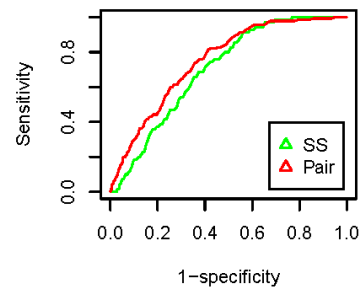

**1KLU\_AB\_D**

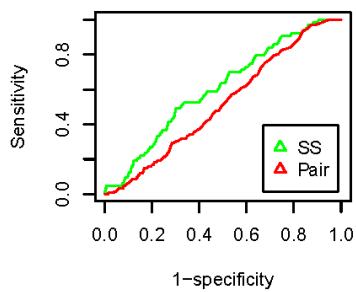

**1KTZ\_A\_B**

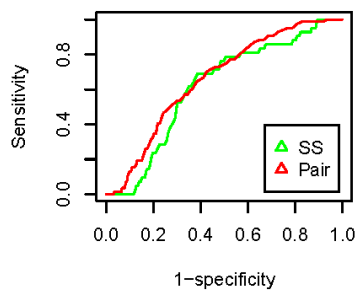

**1KXP\_A\_D**

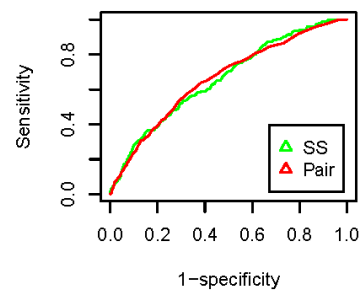

**1QA9\_A\_B**

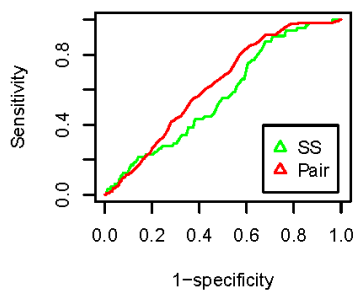

**1RLB\_ABCD\_E**

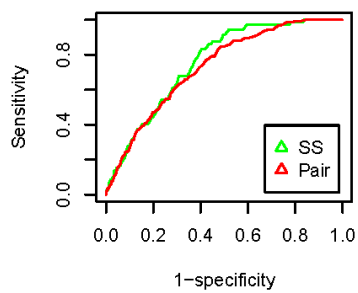

**1S1Q\_A\_B**

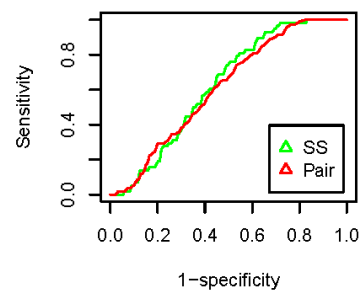

**1SBB\_A\_B**

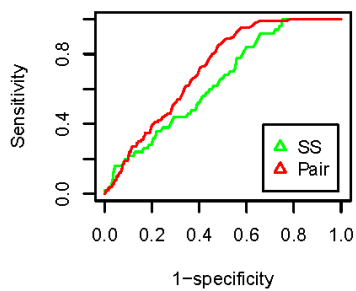

**1T6B\_X\_Y**

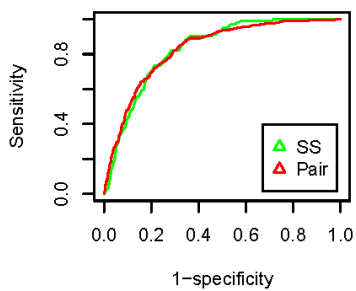

**1XD3\_A\_B**

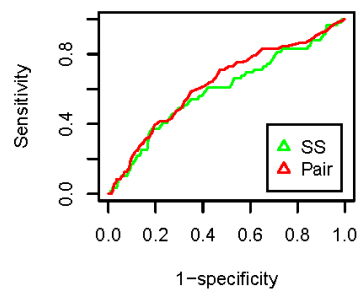

**1Z0K\_A\_B**

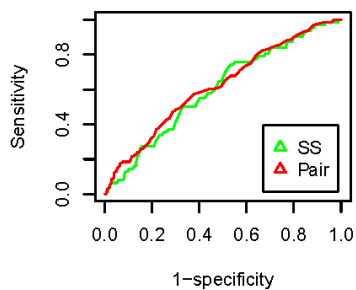

**1Z5Y\_D\_E**

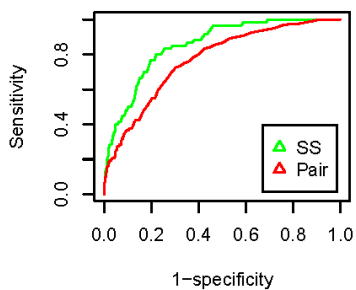

**1ZHI\_A\_B**

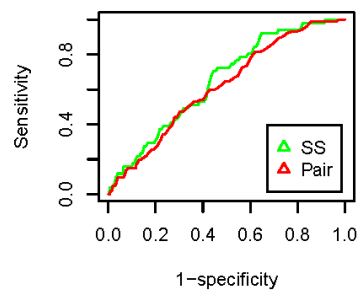

**2AJF\_A\_E**

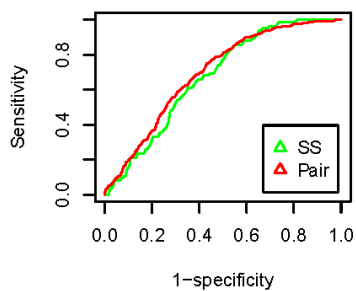

**2BTF\_A\_P**

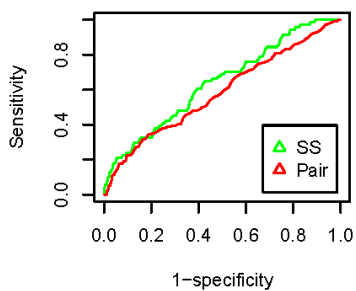

**2HLE\_A\_B**

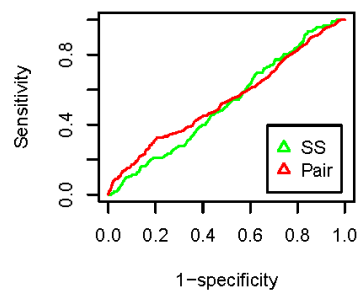

**2HQS\_A\_H**

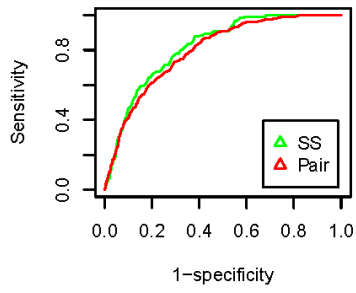

**2OQB\_A\_B**

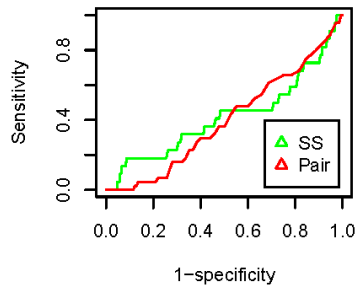

**1AHW\_AB\_C**

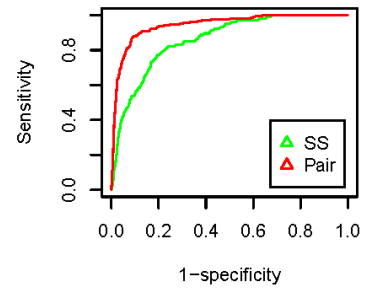

**1BVK\_DE\_F**

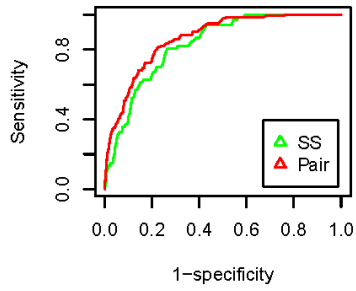

**1DQJ\_AB\_C**

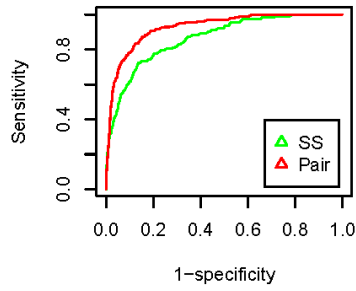

**1E6J\_HL\_P**

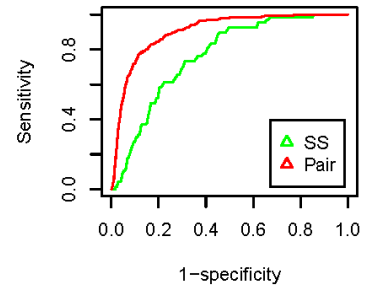

**1JPS\_HL\_T**

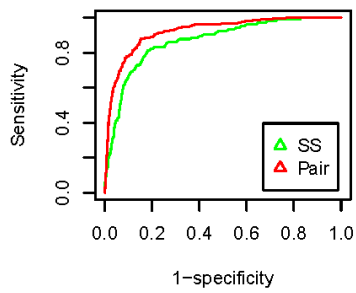

**1MLC\_AB\_E**

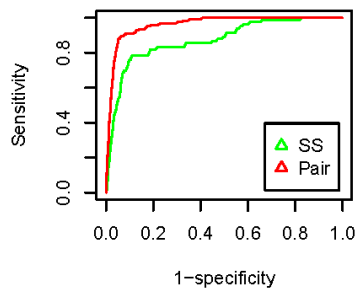

**1VFB\_AB\_C**

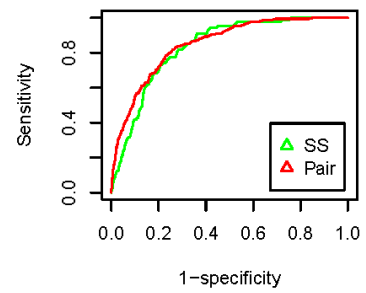



**1WEJ\_HL\_F**

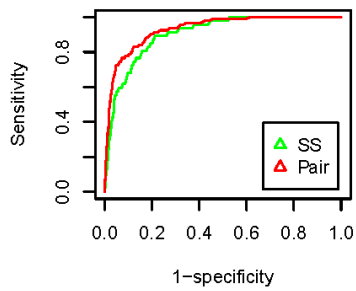

**2FD6\_HL\_U**

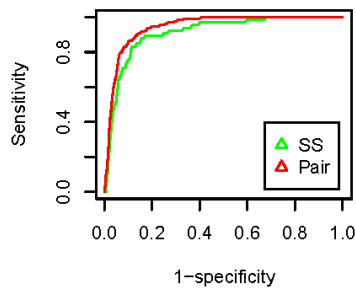

**2I25\_N\_L**

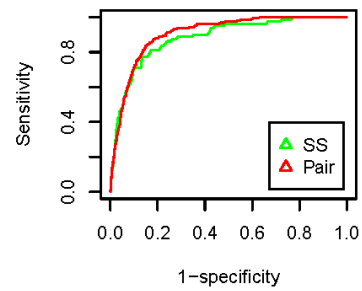

**2VIS\_AB\_C**

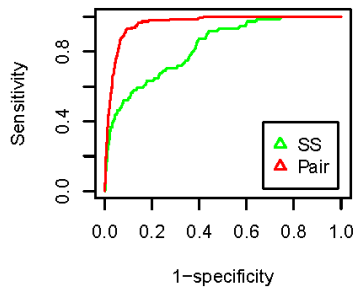

**1BJ1\_HL\_VW**

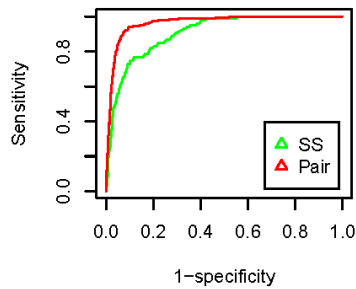

**1FSK\_BC\_A**

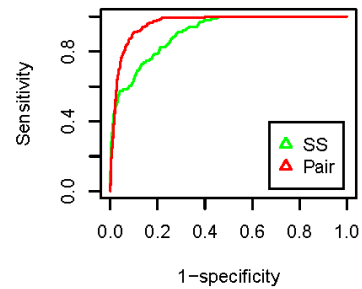

**1I9R\_HL\_ABC**

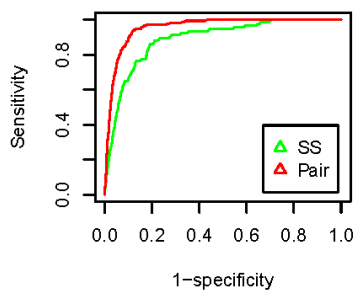

**1IQD\_AB\_C**

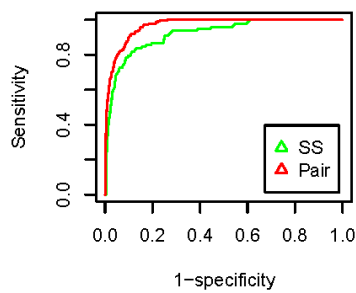

**1K4C\_AB\_C**

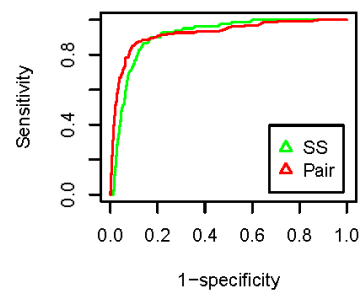

**1KXQ\_H\_A**

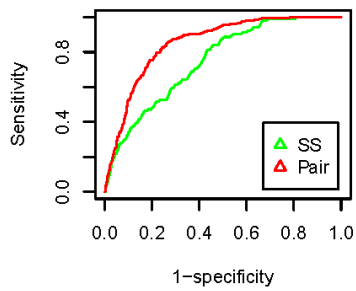

**1NCA\_HL\_N**

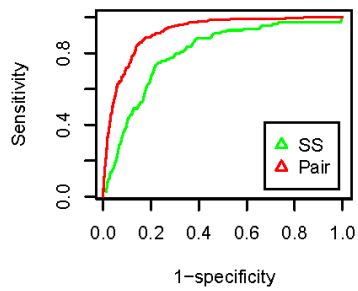

**1NSN\_HL\_S**

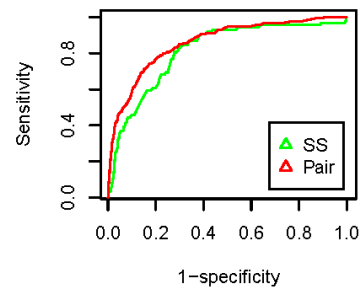

**1QFW\_HL\_AB**

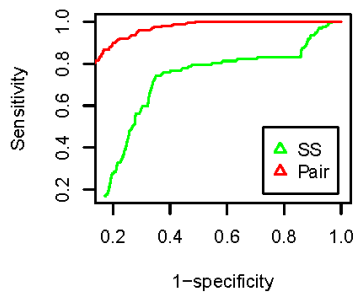

**1QFW\_IM\_AB**

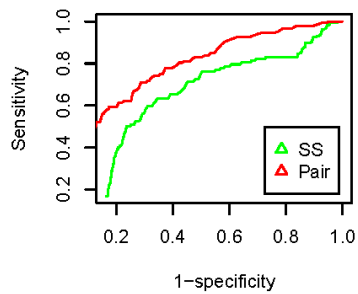

**2JEL\_HL\_P**

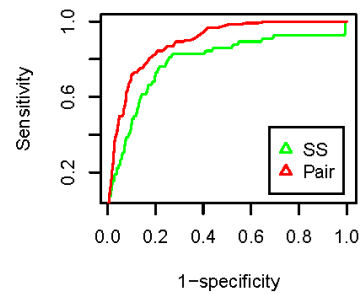

**1ACB\_E\_I**

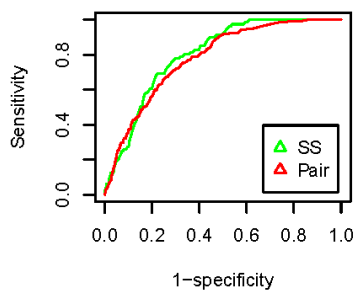

**1IJK\_A\_BC**

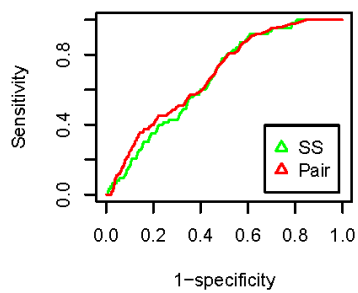

**1KKL\_ABC\_H**

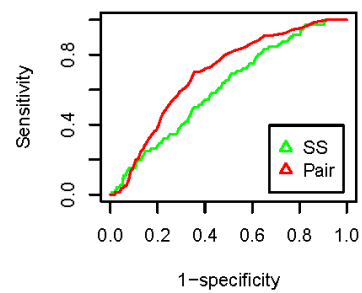

**1M10\_A\_B**

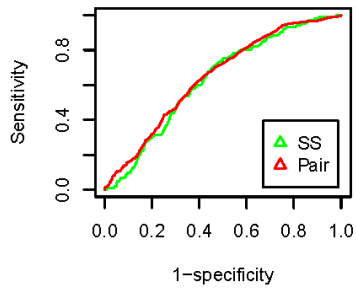

**1NW9\_B\_A**

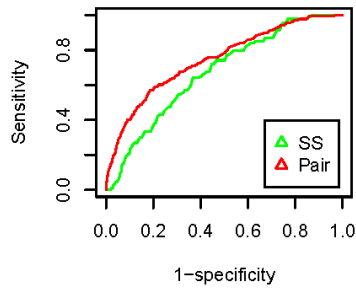

**1GP2\_A\_BG**

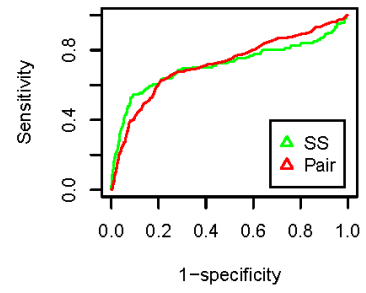

**1GRN\_A\_B**

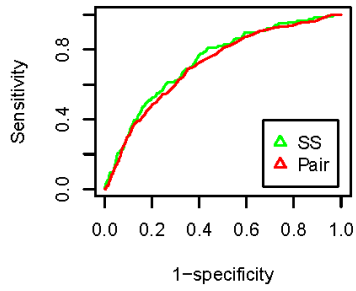

**1HE8\_B\_A**

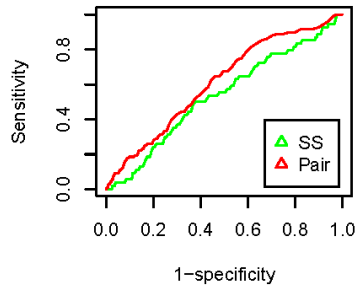

**1I2M\_A\_B**

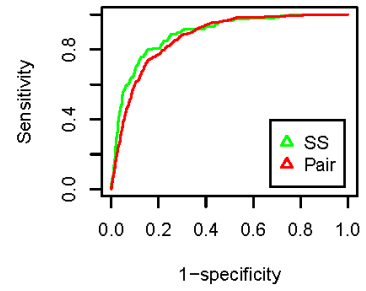

**1I1B\_AB\_E**

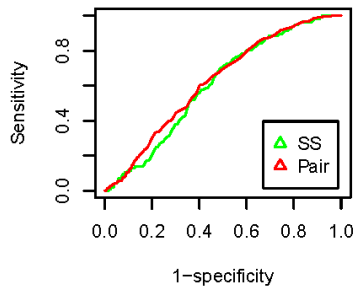

**1K5D\_AB\_C**

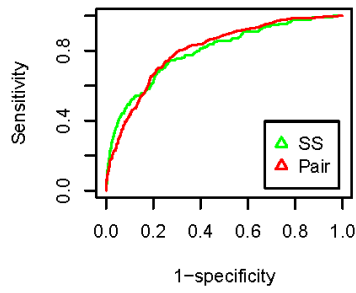

**1N2C\_ABCD\_EF**

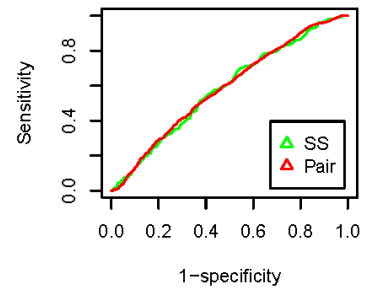

**1WQ1\_R\_G**

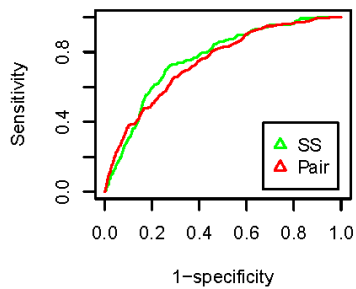

**1XQS\_A\_C**

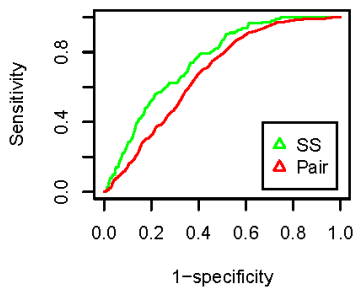

**2CFH\_A\_C**

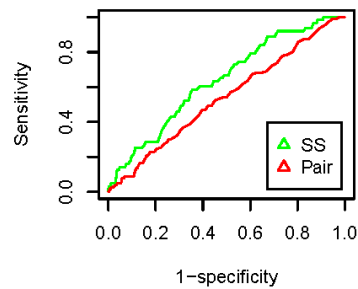

**2H7V\_A\_C**

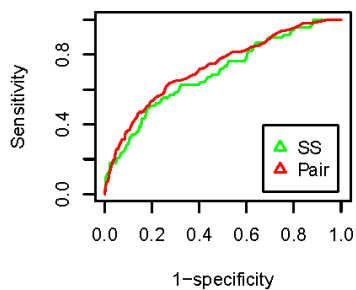

**2HRK\_A\_B**

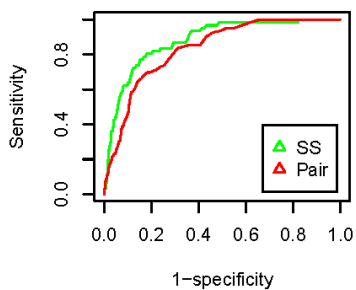

**2NZ8\_A\_B**

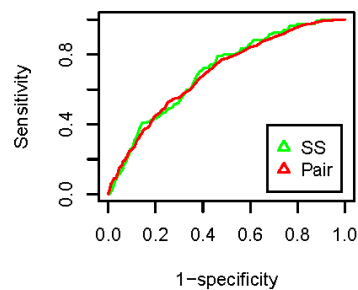

**1BGX\_HL\_T**

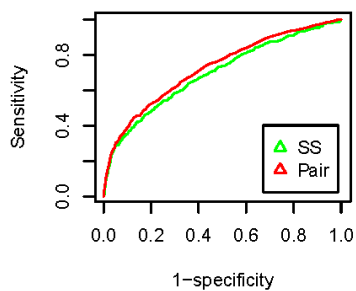

**1FQ1\_A\_B**

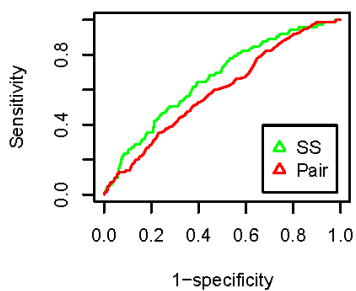

**1PXV\_A\_C**

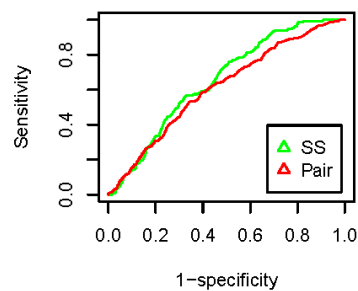

**1ATN\_A\_D**

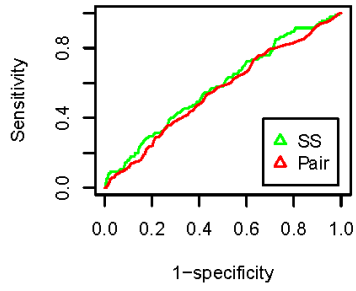

**1BKD\_R\_S**

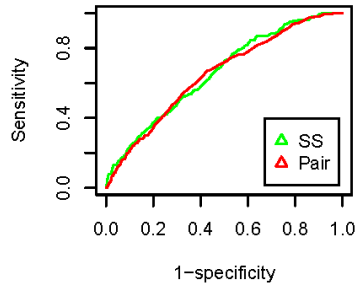

**1DE4\_AB\_CF**

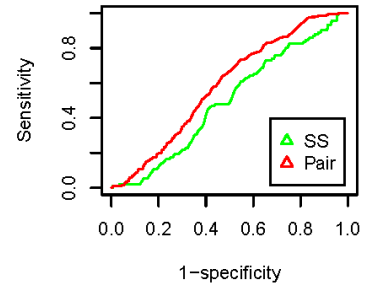

**1EER\_A\_BC**

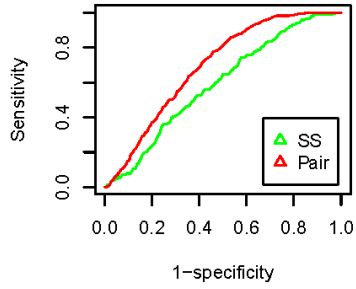

**1FAK\_HL\_T**

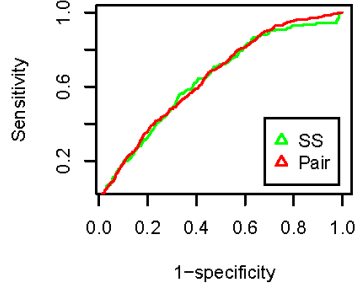

**1H1V\_A\_G**

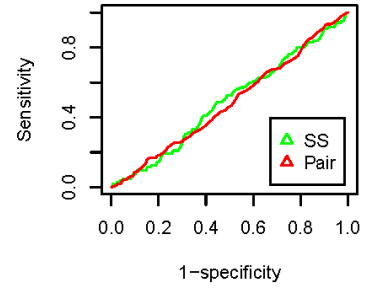

**1IBR\_A\_B**

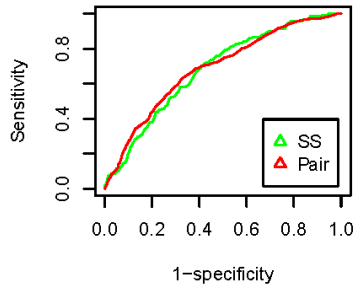

**1IRA\_Y\_X**

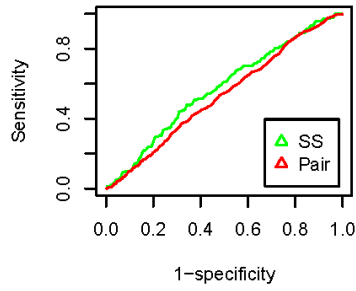

**1JMO\_A\_HL**

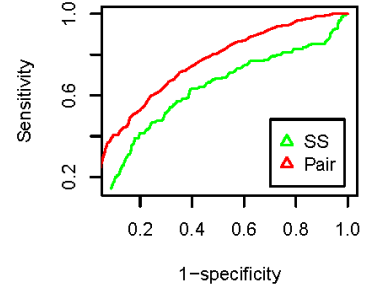

**1R8S\_A\_E**

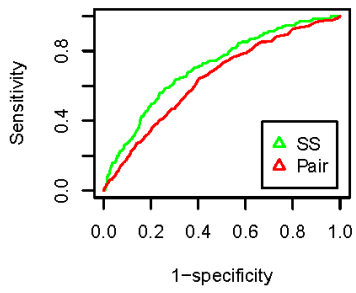

**1Y64\_A\_B**

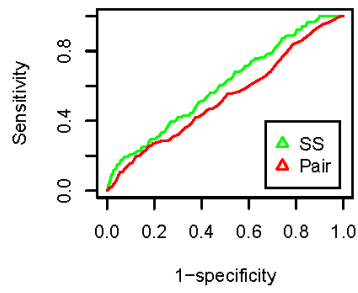

**2COL\_A\_B**

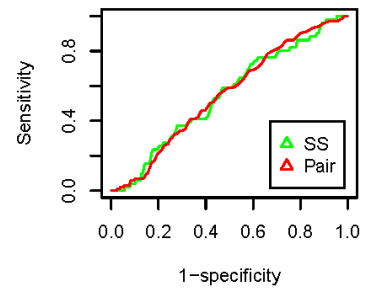

**2OT3\_B\_A**

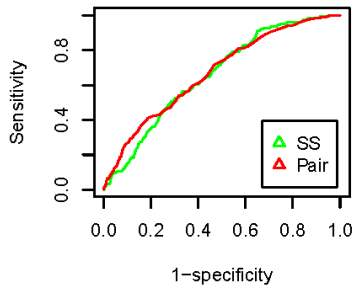

**1E4K\_AB\_C**

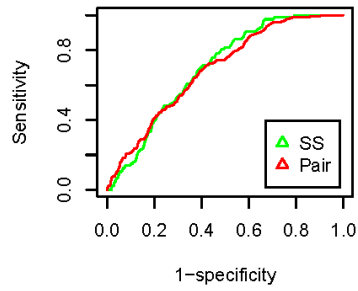

**2HMI\_CD\_AB**

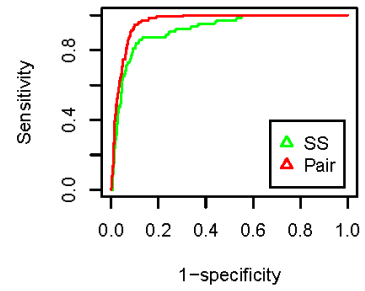

Supplement: pone.0029104.s001.pdf [file pone.0029104.s001.pdf]
