# Supplementary material for: Partner-Aware Prediction of Interacting Residues in Protein-Protein Complexes from Sequence Data
Source: PubMed Central journal article supplement (PMC3237601; doi:10.1371/journal.pone.0029104), 2011-12-14
Supplement: pone.0029104.s003.pdf [file pone.0029104.s003.pdf]

**Supplementary data:**

Table S1: Contact preferences of residue pairs (sorted by p-values). Total number of residue pairs in the entire data set is 7,750,982 of which 11,259 have at least one contact within (one residue of the pair is less than 6.0Å from the other).

| Residue Pair | # Occurrences | Propensity | Observed no. of contacting pairs | Expected no. of contacting pairs | Chi-square | p-value  |
|--------------|---------------|------------|----------------------------------|----------------------------------|------------|----------|
| D-R          | 38053         | 2.9        | 161                              | 55.3                             | 202.2      | 6.85E-46 |
| R-Y          | 27214         | 3.0        | 119                              | 39.5                             | 159.8      | 1.28E-36 |
| N-Y          | 27275         | 3.0        | 118                              | 39.6                             | 155.1      | 1.36E-35 |
| E-R          | 43020         | 2.4        | 152                              | 62.5                             | 128.2      | 1.01E-29 |
| R-W          | 10880         | 3.6        | 57                               | 15.8                             | 107.4      | 3.67E-25 |
| N-R          | 29478         | 2.4        | 104                              | 42.8                             | 87.4       | 8.80E-21 |
| K-Y          | 38155         | 2.2        | 124                              | 55.4                             | 84.9       | 3.22E-20 |
| D-K          | 53701         | 2.0        | 158                              | 78.0                             | 82.0       | 1.34E-19 |
| E-K          | 61956         | 1.9        | 172                              | 90.0                             | 74.7       | 5.42E-18 |
| W-Y          | 10501         | 3.2        | 49                               | 15.3                             | 74.7       | 5.60E-18 |
| T-Y          | 40180         | 2.1        | 124                              | 58.4                             | 73.8       | 8.60E-18 |
| Q-Y          | 24241         | 2.4        | 85                               | 35.2                             | 70.4       | 4.85E-17 |
| D-Y          | 33431         | 2.1        | 101                              | 48.6                             | 56.6       | 5.27E-14 |
| F-Y          | 23691         | 2.3        | 78                               | 34.4                             | 55.2       | 1.09E-13 |
| Q-R          | 26173         | 2.2        | 83                               | 38.0                             | 53.2       | 2.98E-13 |
| A-V          | 74917         | 0.3        | 34                               | 108.8                            | 51.4       | 7.36E-13 |
| P-Y          | 29237         | 2.0        | 85                               | 42.5                             | 42.6       | 6.74E-11 |

|     |       |     |     |       |      |          |
|-----|-------|-----|-----|-------|------|----------|
| M-Y | 12988 | 2.5 | 47  | 18.9  | 42.0 | 9.35E-11 |
| G-Y | 43696 | 1.8 | 115 | 63.5  | 41.8 | 9.95E-11 |
| N-Q | 26939 | 2.0 | 79  | 39.1  | 40.6 | 1.85E-10 |
| A-L | 90550 | 0.5 | 60  | 131.5 | 38.9 | 4.46E-10 |
| L-V | 94746 | 0.5 | 65  | 137.6 | 38.3 | 5.99E-10 |
| K-V | 69074 | 0.4 | 40  | 100.3 | 36.3 | 1.71E-09 |
| H-R | 13625 | 2.3 | 46  | 19.8  | 34.7 | 3.83E-09 |
| H-Y | 12473 | 2.4 | 43  | 18.1  | 34.2 | 5.05E-09 |
| E-L | 84917 | 0.5 | 59  | 123.3 | 33.6 | 6.87E-09 |
| E-V | 70674 | 0.4 | 45  | 102.7 | 32.4 | 1.26E-08 |
| I-V | 57344 | 0.4 | 32  | 83.3  | 31.6 | 1.90E-08 |
| A-P | 49550 | 0.3 | 25  | 72.0  | 30.7 | 3.08E-08 |
| P-W | 12271 | 2.3 | 41  | 17.8  | 30.1 | 4.04E-08 |
| D-L | 74253 | 0.5 | 51  | 107.9 | 30.0 | 4.38E-08 |
| S-Y | 45371 | 1.7 | 110 | 65.9  | 29.5 | 5.59E-08 |
| S-V | 81876 | 0.5 | 61  | 118.9 | 28.2 | 1.08E-07 |
| A-E | 67785 | 0.5 | 46  | 98.5  | 28.0 | 1.24E-07 |
| A-D | 58846 | 0.5 | 39  | 85.5  | 25.3 | 4.98E-07 |
| N-T | 44581 | 1.6 | 105 | 64.8  | 25.0 | 5.71E-07 |
| P-V | 50955 | 0.4 | 31  | 74.0  | 25.0 | 5.73E-07 |
| A-K | 66873 | 0.5 | 49  | 97.1  | 23.9 | 1.04E-06 |
| Q-W | 9977  | 2.3 | 33  | 14.5  | 23.6 | 1.16E-06 |
| A-S | 78135 | 0.5 | 62  | 113.5 | 23.4 | 1.34E-06 |

|     |       |     |     |       |      |          |
|-----|-------|-----|-----|-------|------|----------|
| L-S | 99102 | 0.6 | 86  | 144.0 | 23.3 | 1.36E-06 |
| A-A | 35784 | 0.3 | 18  | 52.0  | 22.2 | 2.44E-06 |
| D-N | 37447 | 1.6 | 89  | 54.4  | 22.0 | 2.71E-06 |
| I-T | 51263 | 0.5 | 34  | 74.5  | 22.0 | 2.74E-06 |
| T-V | 71896 | 0.5 | 57  | 104.4 | 21.5 | 3.46E-06 |
| R-R | 14846 | 2.0 | 43  | 21.6  | 21.3 | 3.92E-06 |
| H-W | 4767  | 2.7 | 19  | 6.9   | 21.1 | 4.46E-06 |
| C-T | 21962 | 0.2 | 6   | 31.9  | 21.0 | 4.52E-06 |
| A-I | 55011 | 0.5 | 40  | 79.9  | 19.9 | 8.03E-06 |
| G-W | 18160 | 1.9 | 49  | 26.4  | 19.4 | 1.06E-05 |
| E-Y | 39234 | 1.6 | 90  | 57.0  | 19.1 | 1.23E-05 |
| A-G | 75458 | 0.6 | 64  | 109.6 | 19.0 | 1.32E-05 |
| K-L | 84632 | 0.6 | 75  | 122.9 | 18.7 | 1.54E-05 |
| R-T | 44625 | 1.5 | 99  | 64.8  | 18.0 | 2.18E-05 |
| L-Y | 53527 | 1.5 | 115 | 77.8  | 17.8 | 2.40E-05 |
| T-W | 17879 | 1.8 | 47  | 26.0  | 17.0 | 3.68E-05 |
| E-I | 51844 | 0.5 | 40  | 75.3  | 16.6 | 4.73E-05 |
| I-Y | 30846 | 1.6 | 72  | 44.8  | 16.5 | 4.86E-05 |
| D-Q | 33025 | 1.6 | 76  | 48.0  | 16.4 | 5.19E-05 |
| G-L | 92001 | 0.7 | 88  | 133.6 | 15.6 | 7.88E-05 |
| G-V | 79029 | 0.6 | 74  | 114.8 | 14.5 | 1.40E-04 |
| L-T | 87113 | 0.7 | 84  | 126.5 | 14.3 | 1.56E-04 |
| D-V | 61006 | 0.6 | 54  | 88.6  | 13.5 | 2.36E-04 |

|     |       |     |     |       |      |          |
|-----|-------|-----|-----|-------|------|----------|
| E-N | 42843 | 1.5 | 91  | 62.2  | 13.3 | 2.66E-04 |
| V-V | 39454 | 0.5 | 30  | 57.3  | 13.0 | 3.09E-04 |
| L-P | 61194 | 0.6 | 55  | 88.9  | 12.9 | 3.25E-04 |
| N-N | 14801 | 1.8 | 38  | 21.5  | 12.7 | 3.73E-04 |
| N-W | 11394 | 1.9 | 31  | 16.6  | 12.6 | 3.83E-04 |
| A-T | 69472 | 0.7 | 66  | 100.9 | 12.1 | 5.10E-04 |
| F-V | 42113 | 0.6 | 34  | 61.2  | 12.1 | 5.12E-04 |
| C-E | 20611 | 0.4 | 11  | 29.9  | 12.0 | 5.38E-04 |
| G-P | 51288 | 0.6 | 45  | 74.5  | 11.7 | 6.31E-04 |
| G-R | 48265 | 1.4 | 98  | 70.1  | 11.1 | 8.65E-04 |
| R-S | 51783 | 1.4 | 104 | 75.2  | 11.0 | 9.05E-04 |
| A-C | 22512 | 0.4 | 14  | 32.7  | 10.7 | 1.07E-03 |
| W-W | 2238  | 2.8 | 9   | 3.3   | 10.2 | 1.43E-03 |
| F-R | 26363 | 1.5 | 58  | 38.3  | 10.1 | 1.45E-03 |
| H-H | 3036  | 2.5 | 11  | 4.4   | 9.8  | 1.70E-03 |
| A-F | 40595 | 0.6 | 35  | 59.0  | 9.7  | 1.80E-03 |
| C-V | 23556 | 0.5 | 16  | 34.2  | 9.7  | 1.84E-03 |
| I-P | 36174 | 0.6 | 30  | 52.5  | 9.7  | 1.87E-03 |
| G-S | 80844 | 0.7 | 84  | 117.4 | 9.5  | 2.03E-03 |
| H-N | 13952 | 1.7 | 34  | 20.3  | 9.3  | 2.28E-03 |
| A-Q | 40920 | 0.6 | 37  | 59.4  | 8.5  | 3.61E-03 |
| D-W | 13491 | 1.6 | 32  | 19.6  | 7.9  | 5.08E-03 |
| K-W | 15686 | 1.6 | 36  | 22.8  | 7.7  | 5.63E-03 |

|     |       |     |    |       |     |          |
|-----|-------|-----|----|-------|-----|----------|
| F-M | 13046 | 1.6 | 31 | 19.0  | 7.7 | 5.64E-03 |
| C-D | 17876 | 0.5 | 12 | 26.0  | 7.5 | 6.13E-03 |
| P-R | 30234 | 1.4 | 62 | 43.9  | 7.4 | 6.36E-03 |
| D-I | 45422 | 0.7 | 44 | 66.0  | 7.3 | 6.81E-03 |
| Q-T | 40265 | 1.4 | 79 | 58.5  | 7.2 | 7.32E-03 |
| C-N | 14703 | 0.4 | 9  | 21.4  | 7.2 | 7.50E-03 |
| G-Q | 42084 | 1.3 | 82 | 61.1  | 7.1 | 7.60E-03 |
| I-S | 57812 | 0.7 | 60 | 84.0  | 6.8 | 8.88E-03 |
| E-G | 69737 | 0.7 | 75 | 101.3 | 6.8 | 8.97E-03 |
| E-H | 19960 | 1.5 | 43 | 29.0  | 6.8 | 9.29E-03 |
| I-K | 50360 | 0.7 | 51 | 73.2  | 6.7 | 9.60E-03 |
| C-P | 15286 | 0.5 | 10 | 22.2  | 6.7 | 9.60E-03 |
| K-K | 29365 | 0.6 | 26 | 42.7  | 6.5 | 1.08E-02 |
| A-M | 23170 | 0.6 | 19 | 33.7  | 6.4 | 1.15E-02 |
| L-N | 57843 | 0.7 | 61 | 84.0  | 6.3 | 1.20E-02 |
| Y-Y | 12047 | 1.6 | 28 | 17.5  | 6.3 | 1.21E-02 |
| K-M | 21159 | 0.6 | 17 | 30.7  | 6.1 | 1.32E-02 |
| C-M | 6982  | 1.8 | 18 | 10.1  | 6.1 | 1.36E-02 |
| D-P | 38923 | 0.7 | 38 | 56.5  | 6.1 | 1.37E-02 |
| S-W | 20452 | 1.4 | 43 | 29.7  | 5.9 | 1.47E-02 |
| G-N | 49192 | 1.3 | 92 | 71.5  | 5.9 | 1.51E-02 |
| H-I | 16090 | 1.5 | 35 | 23.4  | 5.8 | 1.62E-02 |
| C-R | 14480 | 1.5 | 32 | 21.0  | 5.7 | 1.68E-02 |

|     |       |     |    |      |     |          |
|-----|-------|-----|----|------|-----|----------|
| H-M | 6686  | 1.8 | 17 | 9.7  | 5.5 | 1.94E-02 |
| N-S | 50999 | 1.3 | 94 | 74.1 | 5.4 | 2.07E-02 |
| N-V | 48750 | 0.7 | 52 | 70.8 | 5.0 | 2.54E-02 |
| M-V | 24024 | 0.6 | 22 | 34.9 | 4.8 | 2.90E-02 |
| M-S | 23103 | 1.4 | 46 | 33.6 | 4.6 | 3.17E-02 |
| M-W | 4987  | 1.8 | 13 | 7.2  | 4.6 | 3.25E-02 |
| Q-V | 43304 | 0.7 | 46 | 62.9 | 4.5 | 3.31E-02 |
| P-T | 48789 | 0.7 | 53 | 70.9 | 4.5 | 3.38E-02 |
| P-S | 55822 | 0.8 | 62 | 81.1 | 4.5 | 3.40E-02 |
| L-W | 21473 | 1.4 | 43 | 31.2 | 4.5 | 3.45E-02 |
| F-Q | 23442 | 1.4 | 46 | 34.1 | 4.2 | 4.06E-02 |
| E-W | 15520 | 1.4 | 32 | 22.5 | 4.0 | 4.64E-02 |
| F-G | 41615 | 0.7 | 45 | 60.4 | 3.9 | 4.69E-02 |
| V-Y | 43763 | 1.2 | 79 | 63.6 | 3.7 | 5.30E-02 |
| I-W | 12404 | 1.4 | 26 | 18.0 | 3.5 | 6.00E-02 |
| A-N | 45622 | 0.8 | 51 | 66.3 | 3.5 | 6.07E-02 |
| E-Q | 37539 | 1.2 | 68 | 54.5 | 3.3 | 6.81E-02 |
| L-M | 28451 | 1.3 | 53 | 41.3 | 3.3 | 6.94E-02 |
| M-R | 14975 | 1.4 | 30 | 21.8 | 3.1 | 7.70E-02 |
| F-S | 42429 | 0.8 | 48 | 61.6 | 3.0 | 8.25E-02 |
| I-M | 18139 | 0.7 | 18 | 26.3 | 2.6 | 1.04E-01 |
| D-H | 17749 | 1.3 | 34 | 25.8 | 2.6 | 1.06E-01 |
| G-I | 56920 | 0.8 | 68 | 82.7 | 2.6 | 1.06E-01 |

|     |       |     |     |       |     |          |
|-----|-------|-----|-----|-------|-----|----------|
| K-T | 63588 | 0.8 | 77  | 92.4  | 2.6 | 1.10E-01 |
| K-N | 42560 | 1.2 | 74  | 61.8  | 2.4 | 1.21E-01 |
| A-H | 21795 | 0.7 | 23  | 31.7  | 2.4 | 1.24E-01 |
| D-E | 55562 | 0.8 | 67  | 80.7  | 2.3 | 1.27E-01 |
| E-E | 31135 | 0.8 | 35  | 45.2  | 2.3 | 1.28E-01 |
| F-H | 12163 | 1.4 | 24  | 17.7  | 2.3 | 1.32E-01 |
| C-C | 3803  | 0.4 | 2   | 5.5   | 2.2 | 1.34E-01 |
| N-P | 32199 | 1.2 | 57  | 46.8  | 2.2 | 1.35E-01 |
| C-K | 20752 | 0.7 | 22  | 30.1  | 2.2 | 1.38E-01 |
| A-Y | 42263 | 1.2 | 73  | 61.4  | 2.2 | 1.38E-01 |
| K-P | 44693 | 0.8 | 53  | 64.9  | 2.2 | 1.39E-01 |
| P-Q | 28573 | 1.2 | 51  | 41.5  | 2.2 | 1.41E-01 |
| H-Q | 12310 | 1.3 | 24  | 17.9  | 2.1 | 1.48E-01 |
| G-K | 69084 | 0.9 | 86  | 100.4 | 2.1 | 1.52E-01 |
| Q-S | 46310 | 1.2 | 79  | 67.3  | 2.0 | 1.53E-01 |
| D-T | 54596 | 1.2 | 92  | 79.3  | 2.0 | 1.54E-01 |
| I-Q | 30732 | 1.2 | 54  | 44.6  | 2.0 | 1.61E-01 |
| H-V | 22703 | 0.8 | 25  | 33.0  | 1.9 | 1.65E-01 |
| L-R | 58812 | 0.9 | 73  | 85.4  | 1.8 | 1.79E-01 |
| C-L | 27841 | 0.8 | 32  | 40.4  | 1.8 | 1.84E-01 |
| E-T | 64381 | 1.1 | 106 | 93.5  | 1.7 | 1.97E-01 |
| H-S | 23095 | 1.2 | 41  | 33.5  | 1.7 | 1.98E-01 |
| F-F | 11000 | 1.3 | 21  | 16.0  | 1.6 | 2.09E-01 |

|     |       |     |     |       |     |          |
|-----|-------|-----|-----|-------|-----|----------|
| G-M | 24633 | 1.2 | 43  | 35.8  | 1.5 | 2.28E-01 |
| H-L | 27197 | 1.2 | 47  | 39.5  | 1.4 | 2.33E-01 |
| E-M | 21759 | 1.2 | 38  | 31.6  | 1.3 | 2.55E-01 |
| E-P | 44852 | 0.9 | 56  | 65.2  | 1.3 | 2.57E-01 |
| F-P | 26821 | 1.2 | 46  | 39.0  | 1.3 | 2.59E-01 |
| K-S | 73486 | 1.1 | 118 | 106.7 | 1.2 | 2.76E-01 |
| D-G | 60703 | 0.9 | 78  | 88.2  | 1.2 | 2.78E-01 |
| P-P | 16735 | 0.8 | 19  | 24.3  | 1.2 | 2.82E-01 |
| M-N | 14303 | 0.8 | 16  | 20.8  | 1.1 | 2.95E-01 |
| E-F | 38692 | 1.1 | 64  | 56.2  | 1.1 | 2.98E-01 |
| D-F | 32970 | 0.9 | 41  | 47.9  | 1.0 | 3.19E-01 |
| L-L | 57814 | 0.9 | 75  | 84.0  | 1.0 | 3.27E-01 |
| S-T | 76621 | 0.9 | 101 | 111.3 | 1.0 | 3.29E-01 |
| C-Q | 13200 | 0.8 | 15  | 19.2  | 0.9 | 3.40E-01 |
| K-Q | 38020 | 1.1 | 62  | 55.2  | 0.8 | 3.62E-01 |
| F-T | 37566 | 0.9 | 48  | 54.6  | 0.8 | 3.74E-01 |
| F-W | 9456  | 1.2 | 17  | 13.7  | 0.8 | 3.78E-01 |
| F-K | 36660 | 0.9 | 47  | 53.3  | 0.7 | 3.92E-01 |
| M-Q | 12015 | 1.2 | 21  | 17.5  | 0.7 | 3.96E-01 |
| D-S | 60686 | 1.1 | 96  | 88.2  | 0.7 | 4.03E-01 |
| D-M | 19320 | 0.9 | 24  | 28.1  | 0.6 | 4.43E-01 |
| H-P | 14168 | 1.2 | 24  | 20.6  | 0.6 | 4.51E-01 |
| I-L | 69156 | 0.9 | 93  | 100.5 | 0.6 | 4.57E-01 |



|     |       |     |     |       |     |          |
|-----|-------|-----|-----|-------|-----|----------|
| E-S | 74564 | 1.1 | 116 | 108.3 | 0.5 | 4.60E-01 |
| G-H | 21942 | 1.1 | 36  | 31.9  | 0.5 | 4.65E-01 |
| I-N | 34402 | 0.9 | 45  | 50.0  | 0.5 | 4.82E-01 |
| I-I | 21194 | 0.9 | 27  | 30.8  | 0.5 | 4.95E-01 |
| H-K | 19778 | 1.1 | 32  | 28.7  | 0.4 | 5.42E-01 |
| C-Y | 13420 | 1.1 | 22  | 19.5  | 0.3 | 5.70E-01 |
| M-T | 20607 | 1.1 | 33  | 29.9  | 0.3 | 5.75E-01 |
| F-N | 25901 | 1.1 | 41  | 37.6  | 0.3 | 5.82E-01 |
| A-W | 17697 | 0.9 | 23  | 25.7  | 0.3 | 5.93E-01 |
| V-W | 18293 | 0.9 | 24  | 26.6  | 0.2 | 6.18E-01 |
| M-P | 14931 | 1.1 | 24  | 21.7  | 0.2 | 6.20E-01 |
| A-R | 46877 | 0.9 | 64  | 68.1  | 0.2 | 6.20E-01 |
| M-M | 4001  | 1.2 | 7   | 5.8   | 0.2 | 6.22E-01 |
| H-T | 20195 | 1.1 | 32  | 29.3  | 0.2 | 6.23E-01 |
| Q-Q | 11791 | 1.1 | 19  | 17.1  | 0.2 | 6.51E-01 |
| F-L | 51234 | 1.0 | 71  | 74.4  | 0.2 | 6.92E-01 |
| K-R | 42060 | 1.0 | 64  | 61.1  | 0.1 | 7.10E-01 |
| C-F | 12793 | 0.9 | 17  | 18.6  | 0.1 | 7.13E-01 |
| C-G | 24164 | 0.9 | 33  | 35.1  | 0.1 | 7.23E-01 |
| I-R | 34720 | 1.0 | 48  | 50.4  | 0.1 | 7.32E-01 |
| G-G | 40228 | 1.0 | 61  | 58.4  | 0.1 | 7.37E-01 |
| T-T | 33977 | 1.0 | 47  | 49.4  | 0.1 | 7.37E-01 |
| G-T | 72141 | 1.0 | 108 | 104.8 | 0.1 | 7.54E-01 |

|     |       |     |    |      |     |          |
|-----|-------|-----|----|------|-----|----------|
| S-S | 41914 | 1.0 | 63 | 60.9 | 0.1 | 7.86E-01 |
| C-W | 5667  | 1.1 | 9  | 8.2  | 0.1 | 7.89E-01 |
| R-V | 48201 | 1.0 | 68 | 70.0 | 0.1 | 8.10E-01 |
| L-Q | 52287 | 1.0 | 74 | 76.0 | 0.1 | 8.23E-01 |
| F-I | 30741 | 1.0 | 46 | 44.7 | 0.0 | 8.40E-01 |
| C-S | 25630 | 1.0 | 38 | 37.2 | 0.0 | 9.00E-01 |
| C-H | 6645  | 1.0 | 10 | 9.7  | 0.0 | 9.11E-01 |
| D-D | 23855 | 1.0 | 34 | 34.7 | 0.0 | 9.12E-01 |
| C-I | 16712 | 1.0 | 24 | 24.3 | 0.0 | 9.55E-01 |
